# Supplementary material for: Senescent cells inhibit mouse myoblast differentiation via the SASP-lipid 15d-PGJ2 mediated modification and control of HRas
Source: eLife journal article supplement (doi:10.7554/elife.95229), 2024-03-01
Supplement: fig3-data1 [file elife-95229-fig3-data1-v1.zip]

Serum starved  
15d - PGJ2  
Control DMSO 5  $\mu$ M 10  $\mu$ M + 10% Serum

70 kDa

42 kDa

phosphoErk

70 kDa

32 kDa

GAPDH

70 kDa

42 kDa

Erk
