# Supplementary material for: Senescent cells inhibit mouse myoblast differentiation via the SASP-lipid 15d-PGJ2 mediated modification and control of HRas
Source: eLife. 2024 Aug 28;13:RP95229. doi: 10.7554/eLife.95229 (PMC11357351; doi:10.7554/eLife.95229)
Supplement: Figure 1—source data 3. — C2C12 myoblasts treated with DMSO or Doxorubicin (Doxo) (150nM) from Day 0 to 16. [file elife-95229-fig1-data3.xlsx]

## Sheet: Sheet1
Dunnett's multiple comparisons test	Predicted (LS) mean diff.	95.00% CI of diff.	Below threshold?	Summary	Adjusted P Value
Ptgs1
Day 0 vs. Day 4	-0.9532	-9.346 to 7.440	No	ns	0.9955
Day 0 vs. Day 8	0.297	-7.409 to 8.003	No	ns	0.9999
Day 0 vs. Day 12	0.2809	-8.112 to 8.674	No	ns	0.9999
Day 0 vs. Day 16	0.058	-7.648 to 7.764	No	ns	>0.9999
Ptgs2
Day 0 vs. Day 4	-0.5548	-8.274 to 7.164	No	ns	0.9991
Day 0 vs. Day 8	0.2465	-8.169 to 8.663	No	ns	0.9999
Day 0 vs. Day 12	-0.2512	-8.659 to 8.157	No	ns	0.9999
Day 0 vs. Day 16	-0.2055	-8.621 to 8.211	No	ns	>0.9999
Ptgds
Day 0 vs. Day 4	-1.647	-10.51 to 7.220	No	ns	0.97
Day 0 vs. Day 8	-2.944	-11.81 to 5.923	No	ns	0.8112
Day 0 vs. Day 12	-13.2	-22.07 to -4.334	Yes	**	0.002
Day 0 vs. Day 16	-27.01	-35.87 to -18.14	Yes	****	<0.0001
Ptges
Day 0 vs. Day 4	-8.431	-16.84 to -0.02358	Yes	*	0.0492
Day 0 vs. Day 8	-13.84	-22.25 to -5.436	Yes	***	0.0006
Day 0 vs. Day 12	-15.58	-23.99 to -7.170	Yes	***	0.0001
Day 0 vs. Day 16	-19.66	-27.37 to -11.94	Yes	****	<0.0001
