# Supplementary material for: Senescent cells inhibit mouse myoblast differentiation via the SASP-lipid 15d-PGJ2 mediated modification and control of HRas
Source: eLife. 2024 Aug 28;13:RP95229. doi: 10.7554/eLife.95229 (PMC11357351; doi:10.7554/eLife.95229)
Supplement: Figure 1—source data 4. — Concentration of 15d-PGJ2 (picograms (pg) and femtograms (fg)/cell) measured in the conditioned medium of quiescent and senescent C2C12 mouse myoblasts. [file elife-95229-fig1-data4.xlsx]

## Sheet: Sheet1
Sample	15d-PGJ2 (pg)	Cell Number	15d-PGJ2/Cell (fg)
Conditioned medium Quiescent C2C12 cells_1	46.1591	2080000	0.0222
Conditioned medium Quiescent C2C12 cells_2	143.999	1400000	0.1029
Conditioned medium Quiescent C2C12 cells_3	99.7295	2440000	0.0409
Conditioned medium Senescent C2C12 cells_1	1931.69	765000	2.5251
Conditioned medium Senescent C2C12 cells_2	2146.53	1125000	1.908
Conditioned medium Senescent C2C12 cells_3	1957.58	765000	2.5589
