# Supplementary figures and images for: Senescent cells inhibit mouse myoblast differentiation via the SASP-lipid 15d-PGJ2 mediated modification and control of HRas
Source: eLife journal article supplement (doi:10.7554/elife.95229), 2024-03-01

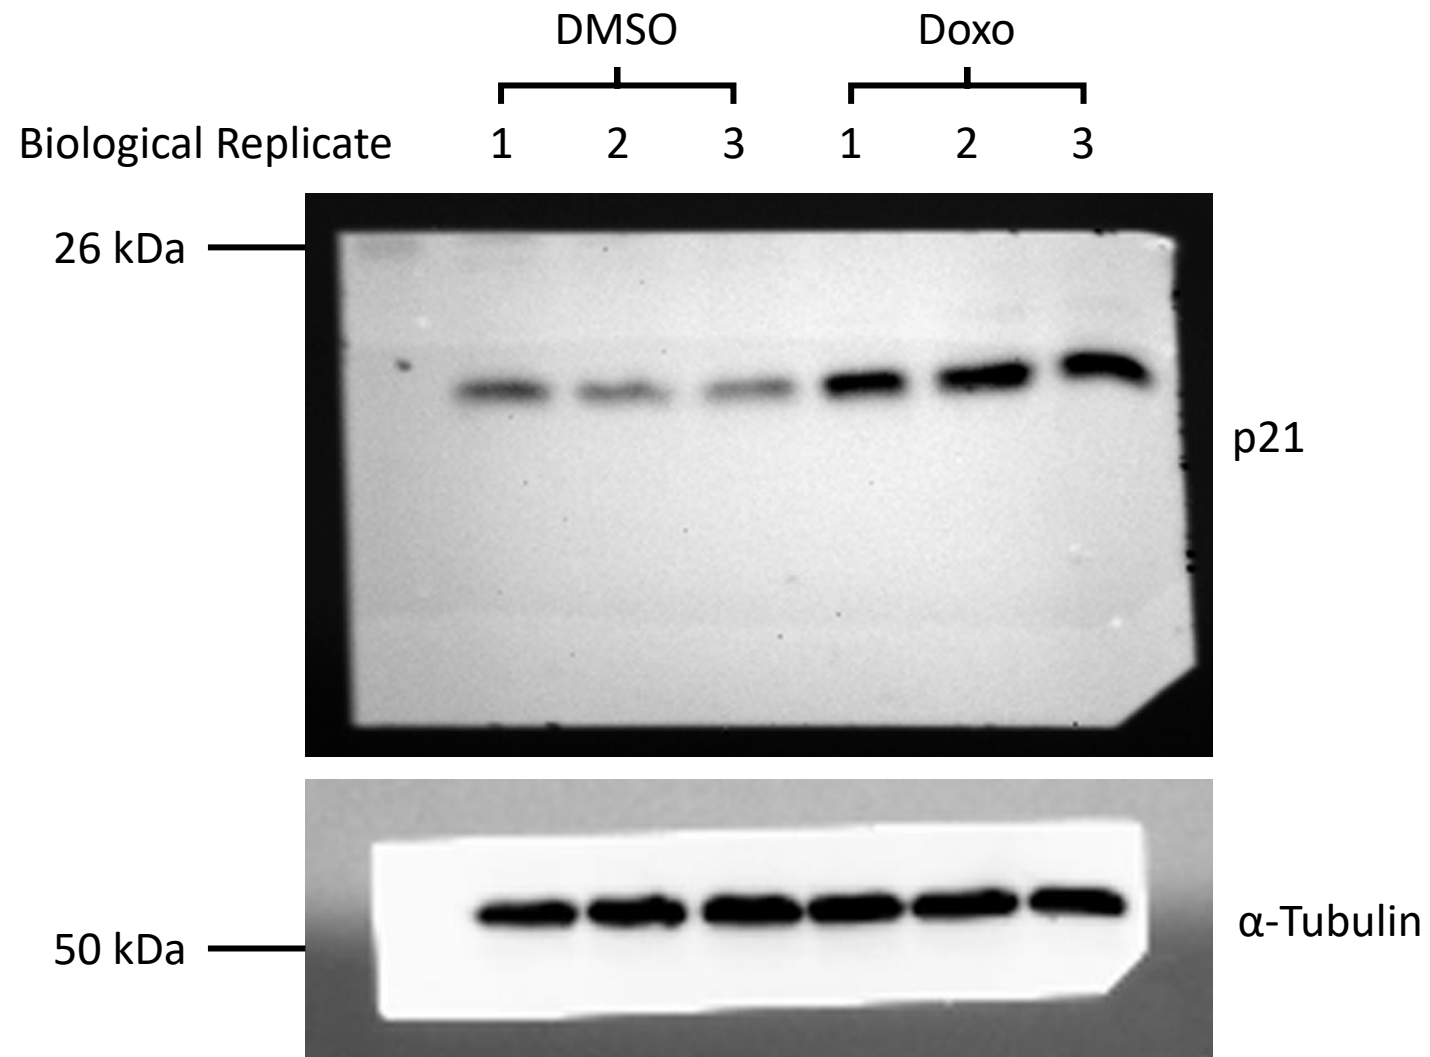

Supplement: fig1-data1 [file elife-95229-fig1-data1-v1.zip]

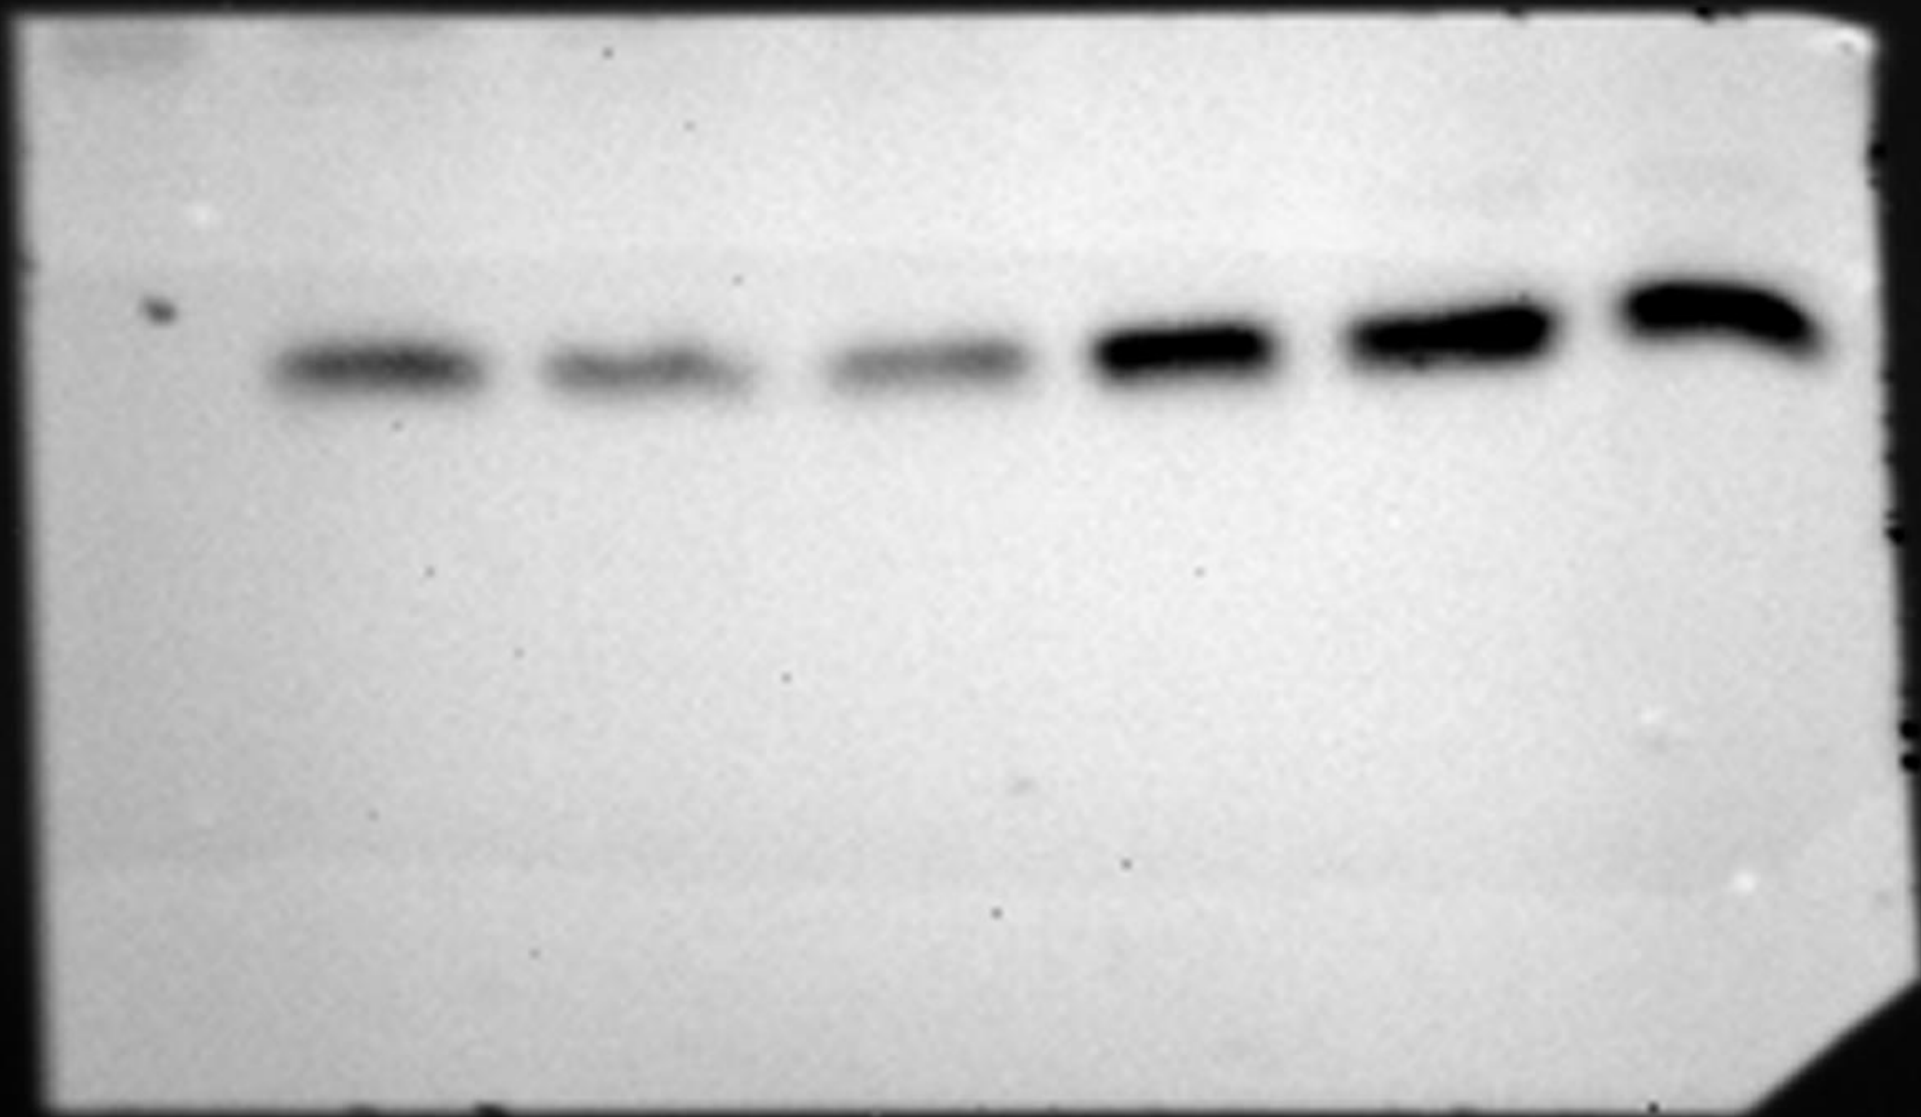

Supplement: fig1-data2 [file elife-95229-fig1-data2-v1.zip]

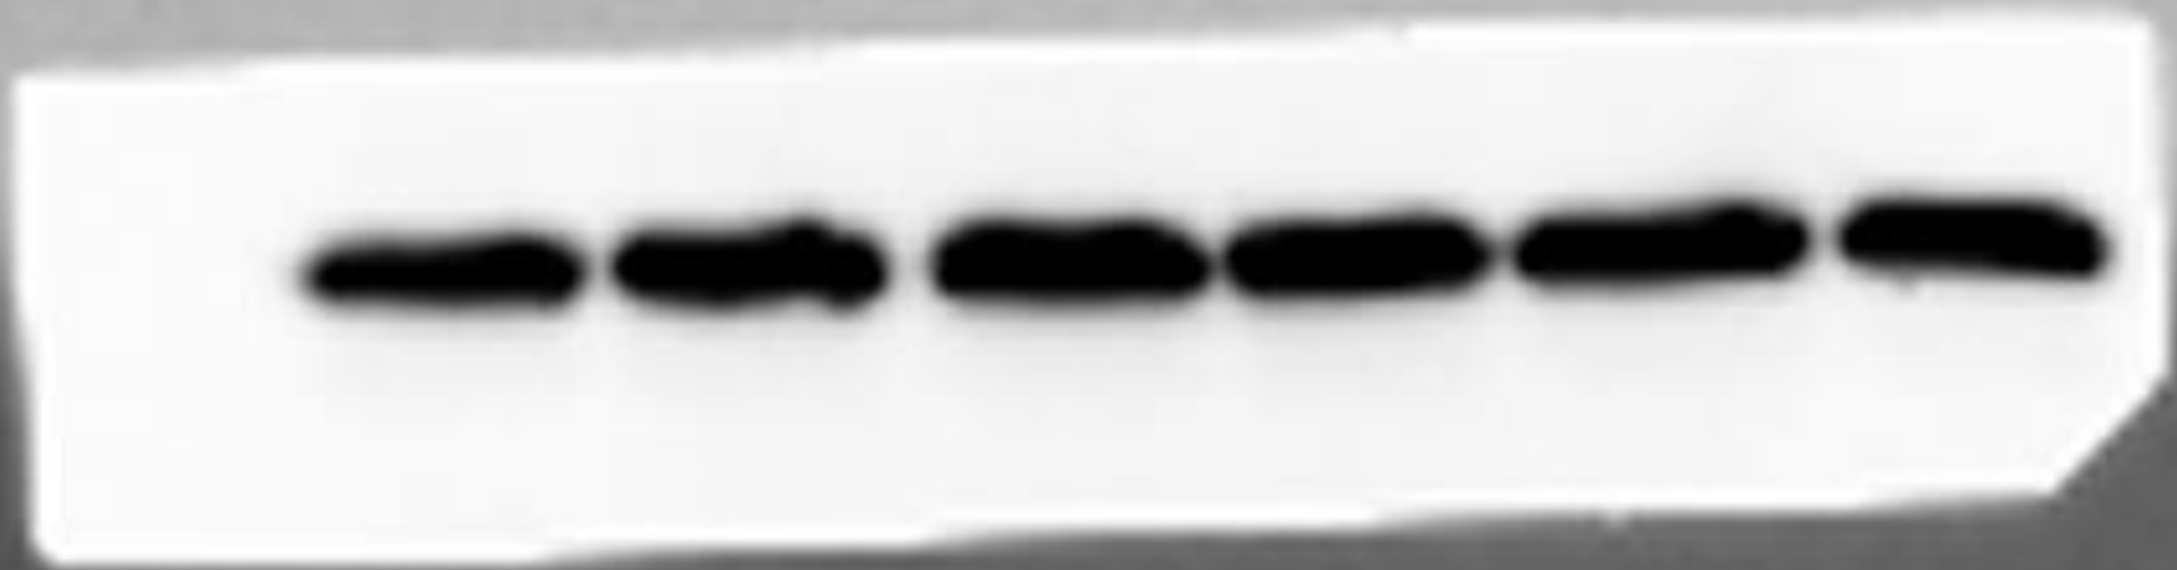

Supplement: fig1-data2 [file elife-95229-fig1-data2-v1.zip]

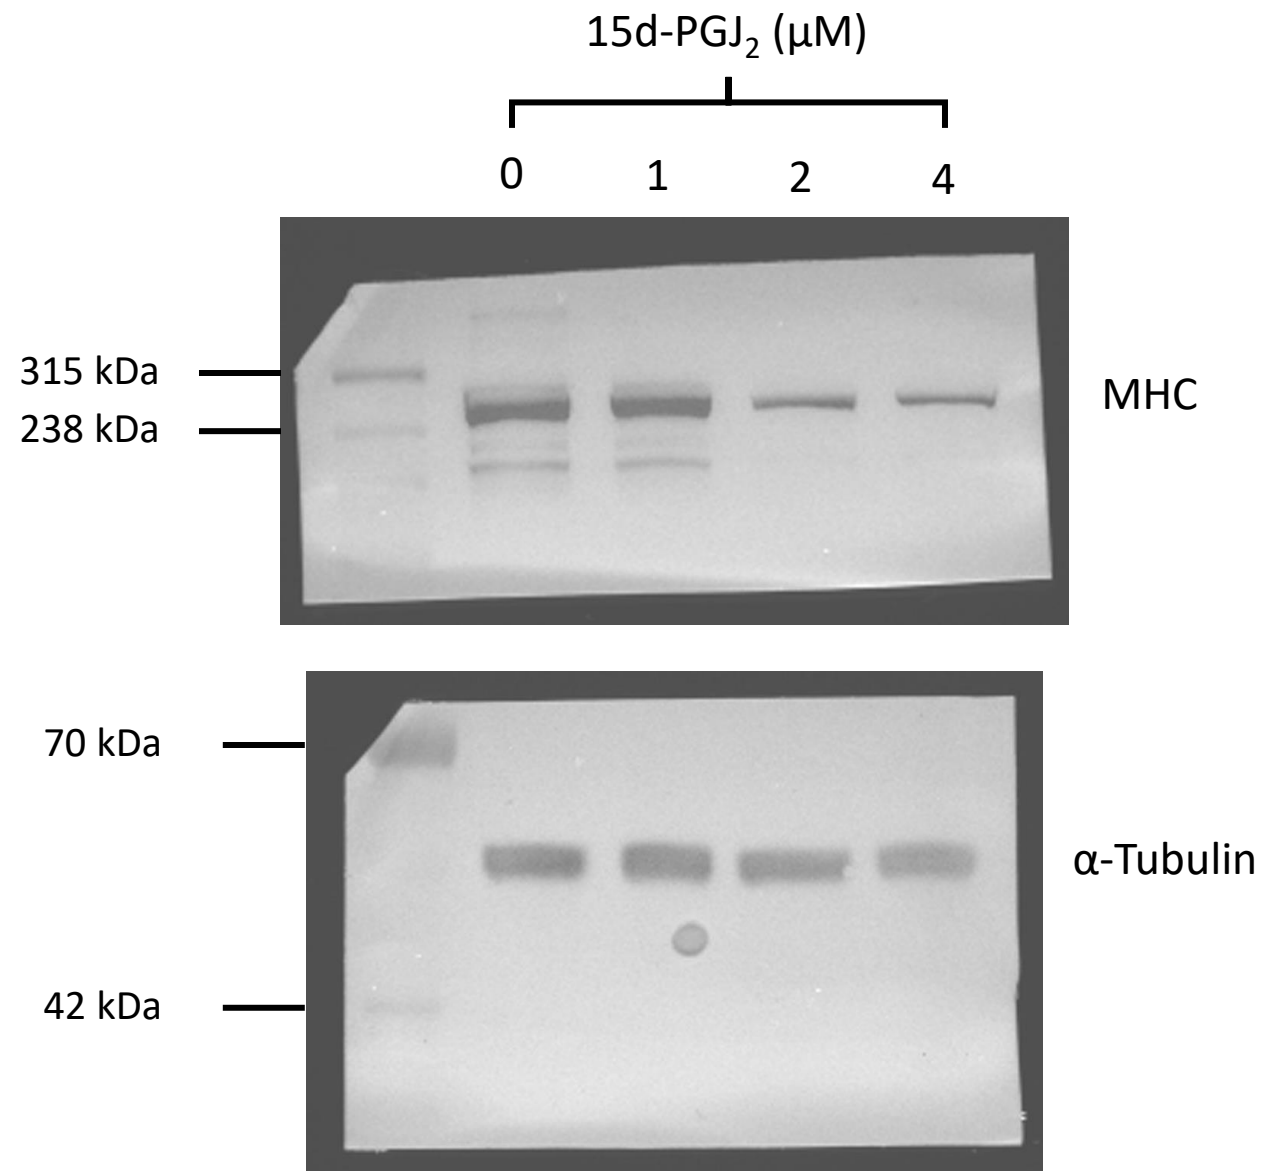

Supplement: fig2-data1 [file elife-95229-fig2-data1-v1.zip]

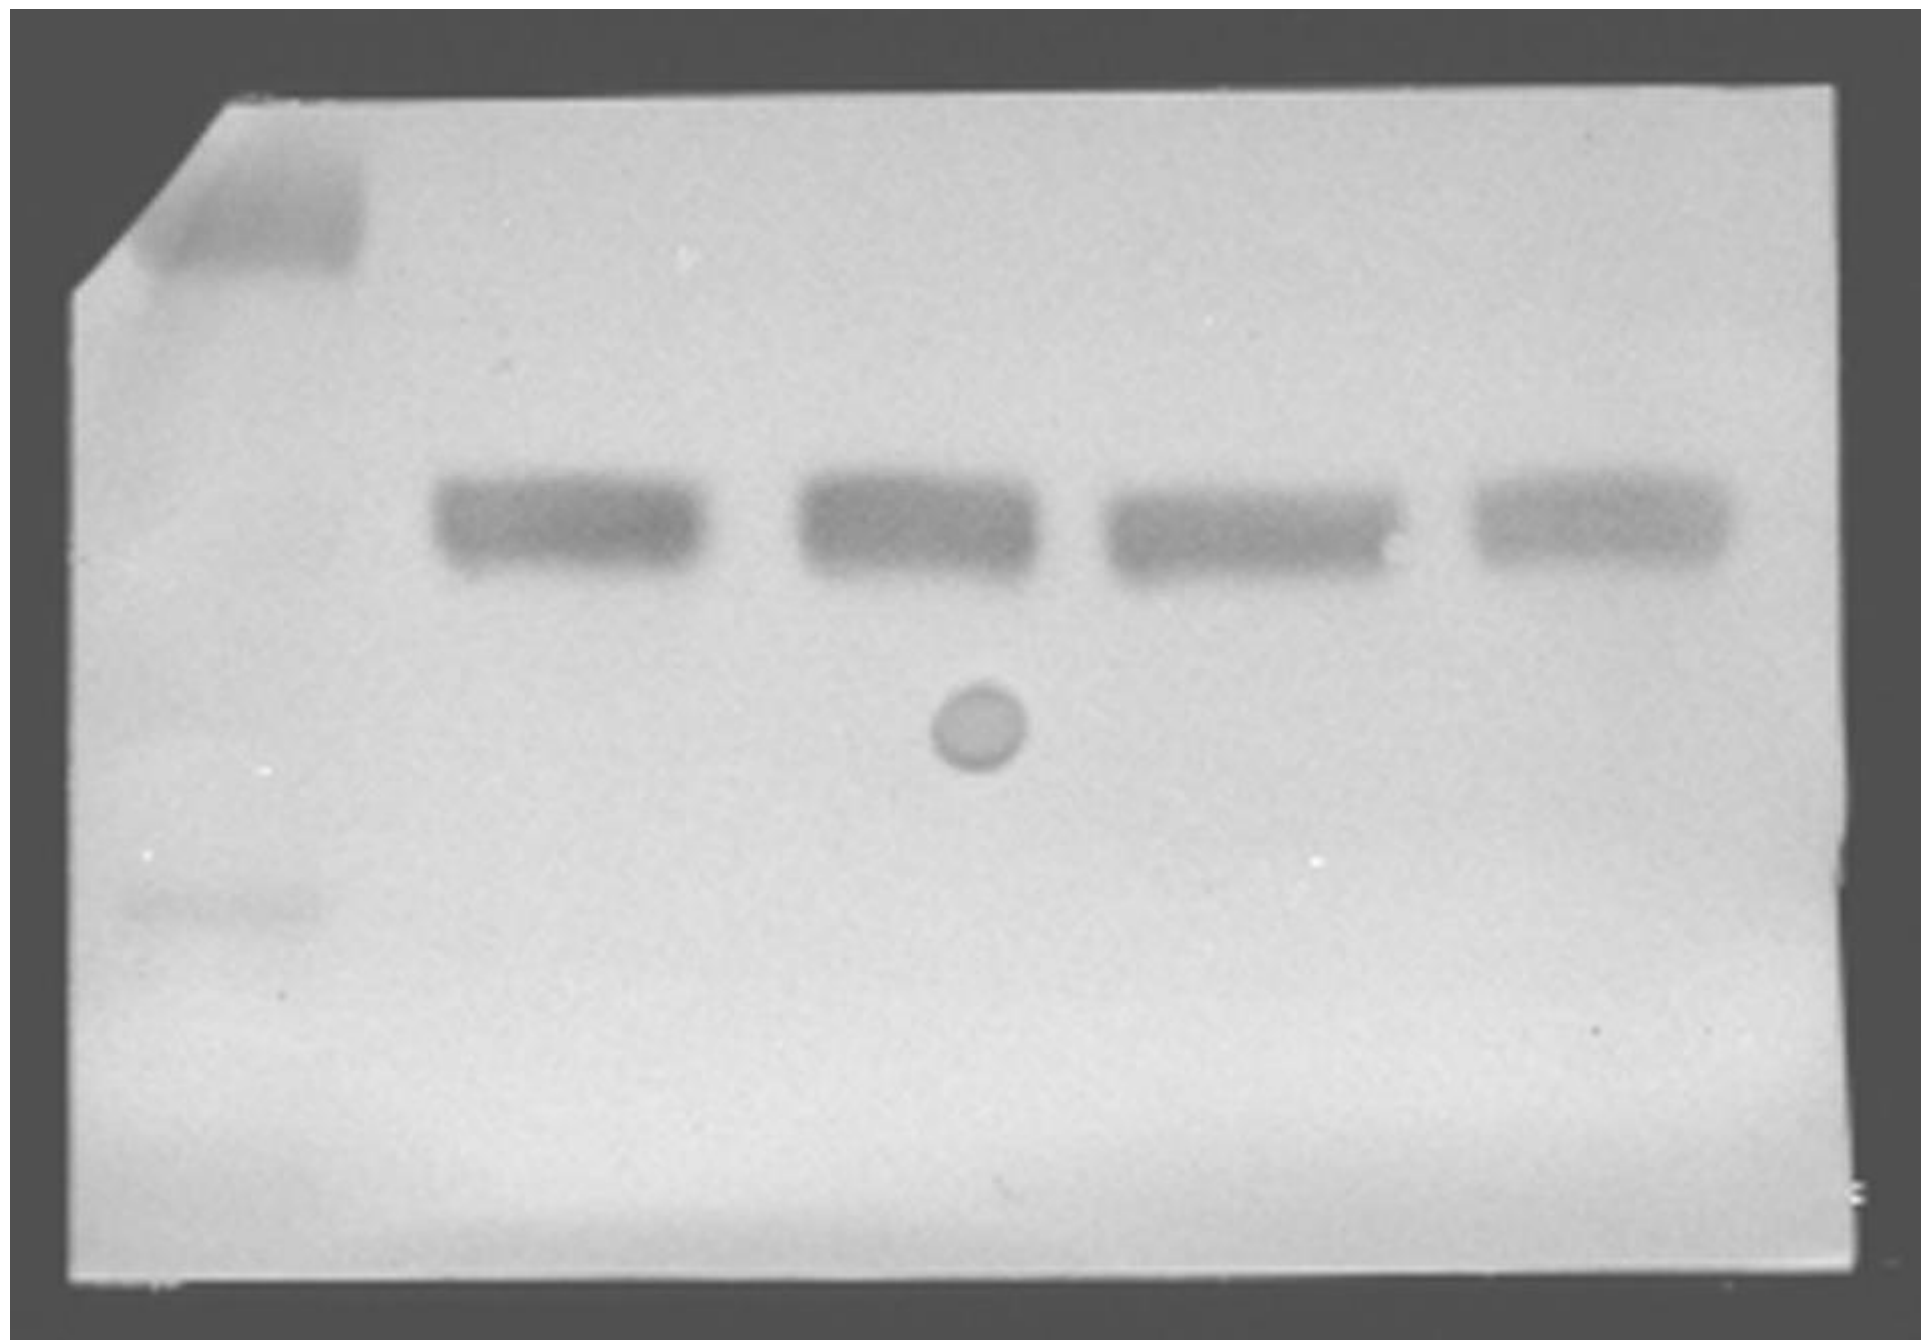

Supplement: fig2-data2 [file elife-95229-fig2-data2-v1.zip]

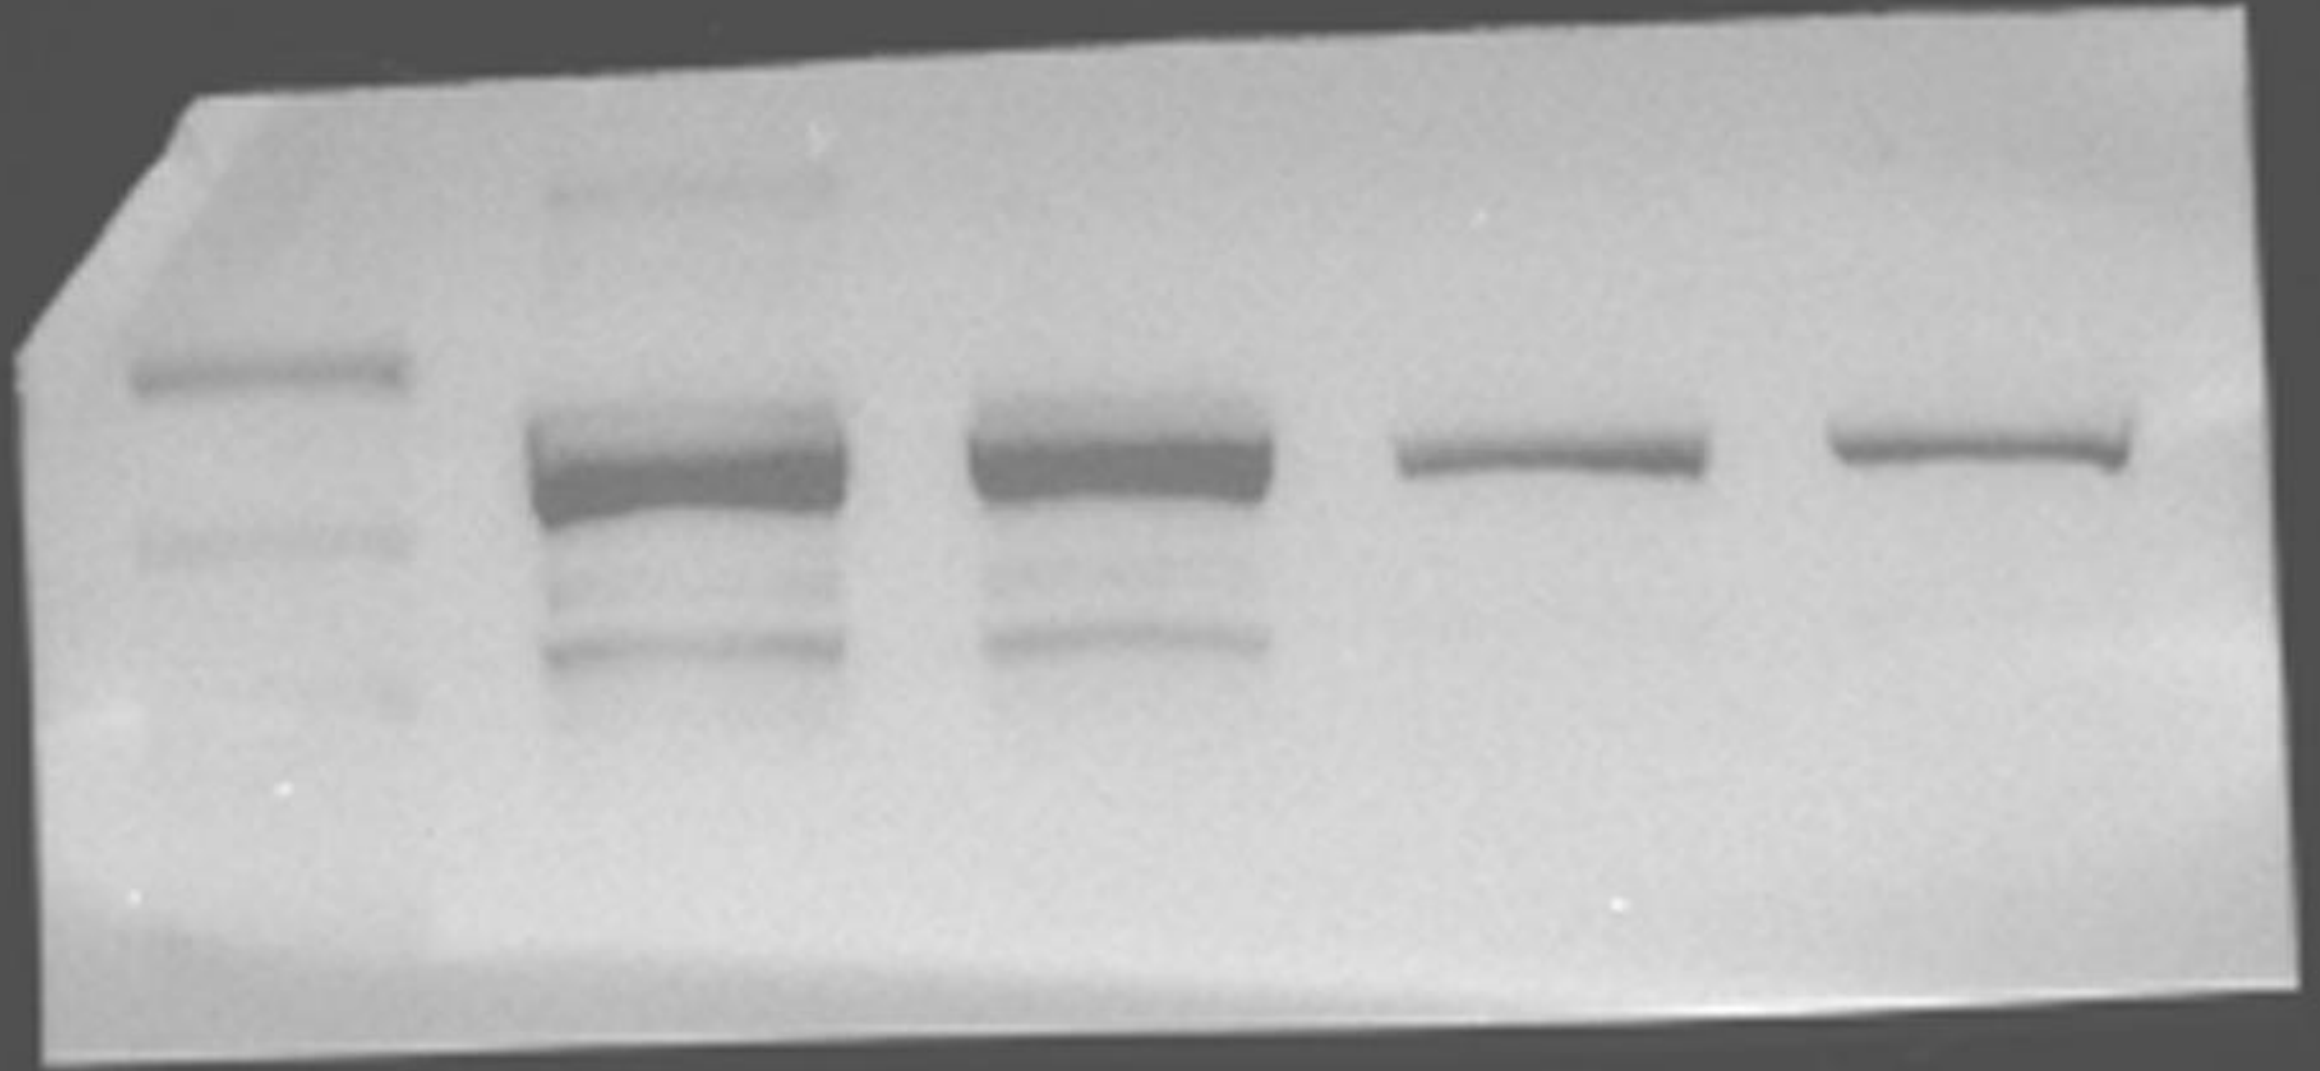

Supplement: fig2-data2 [file elife-95229-fig2-data2-v1.zip]

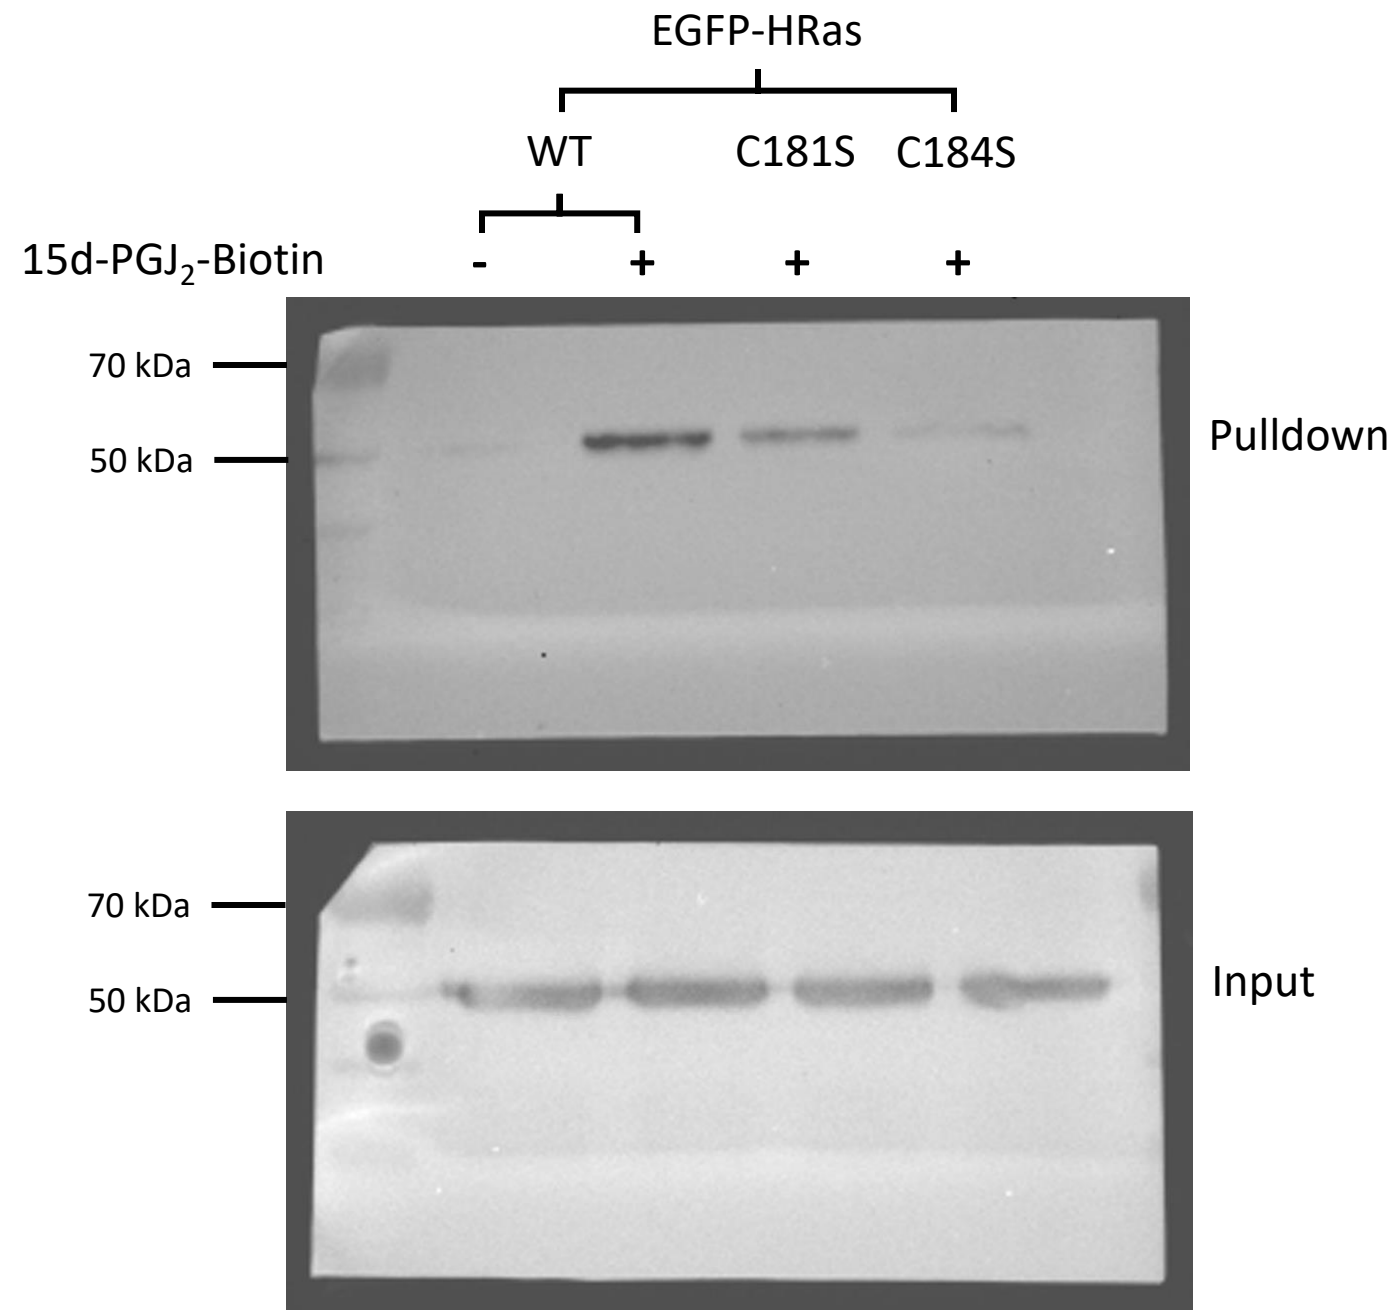

Supplement: fig3-data1 [file elife-95229-fig3-data1-v1.zip]

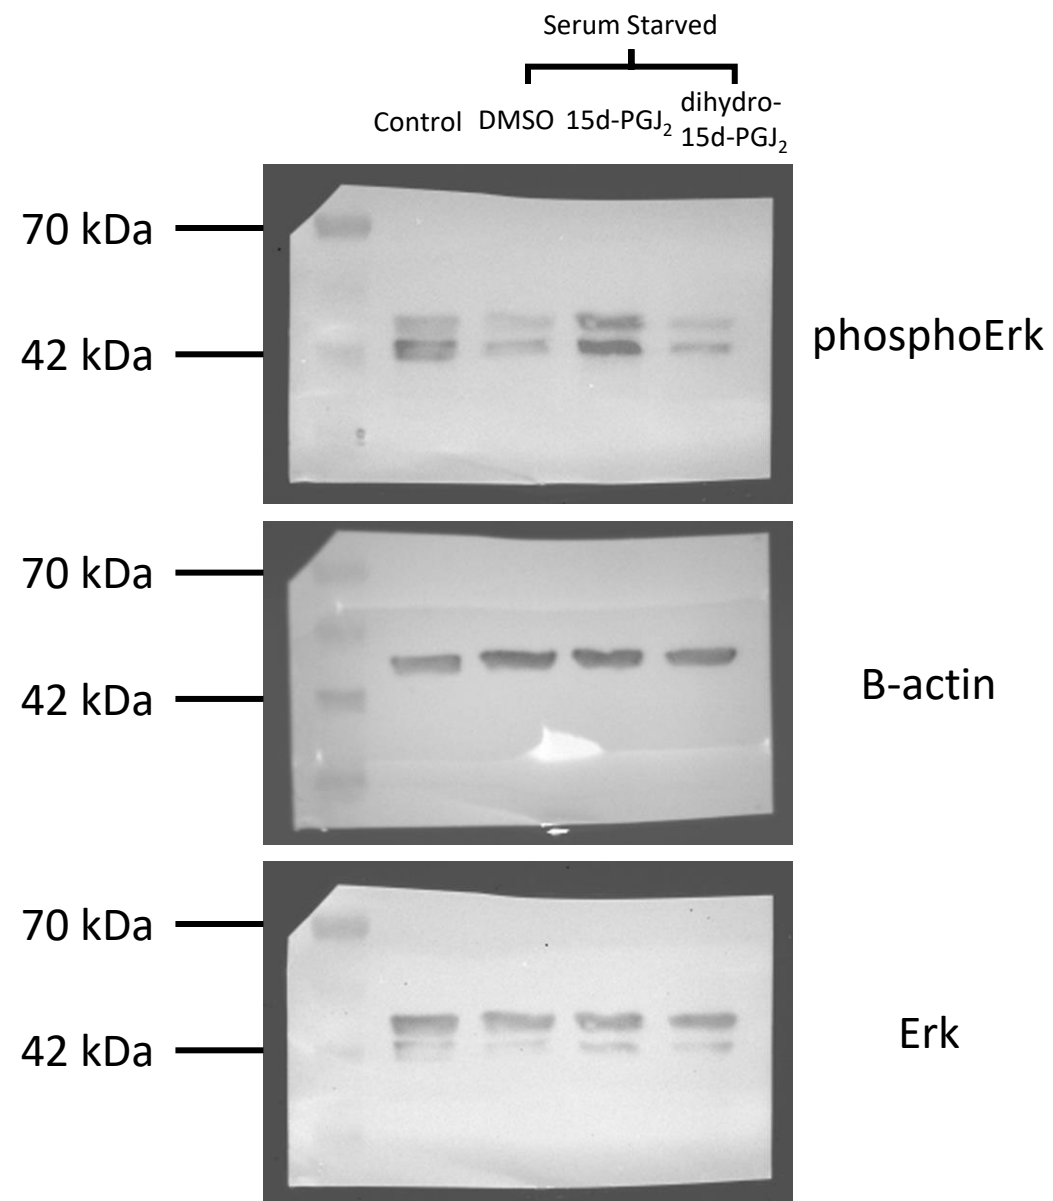

Supplement: fig3-data1 [file elife-95229-fig3-data1-v1.zip]

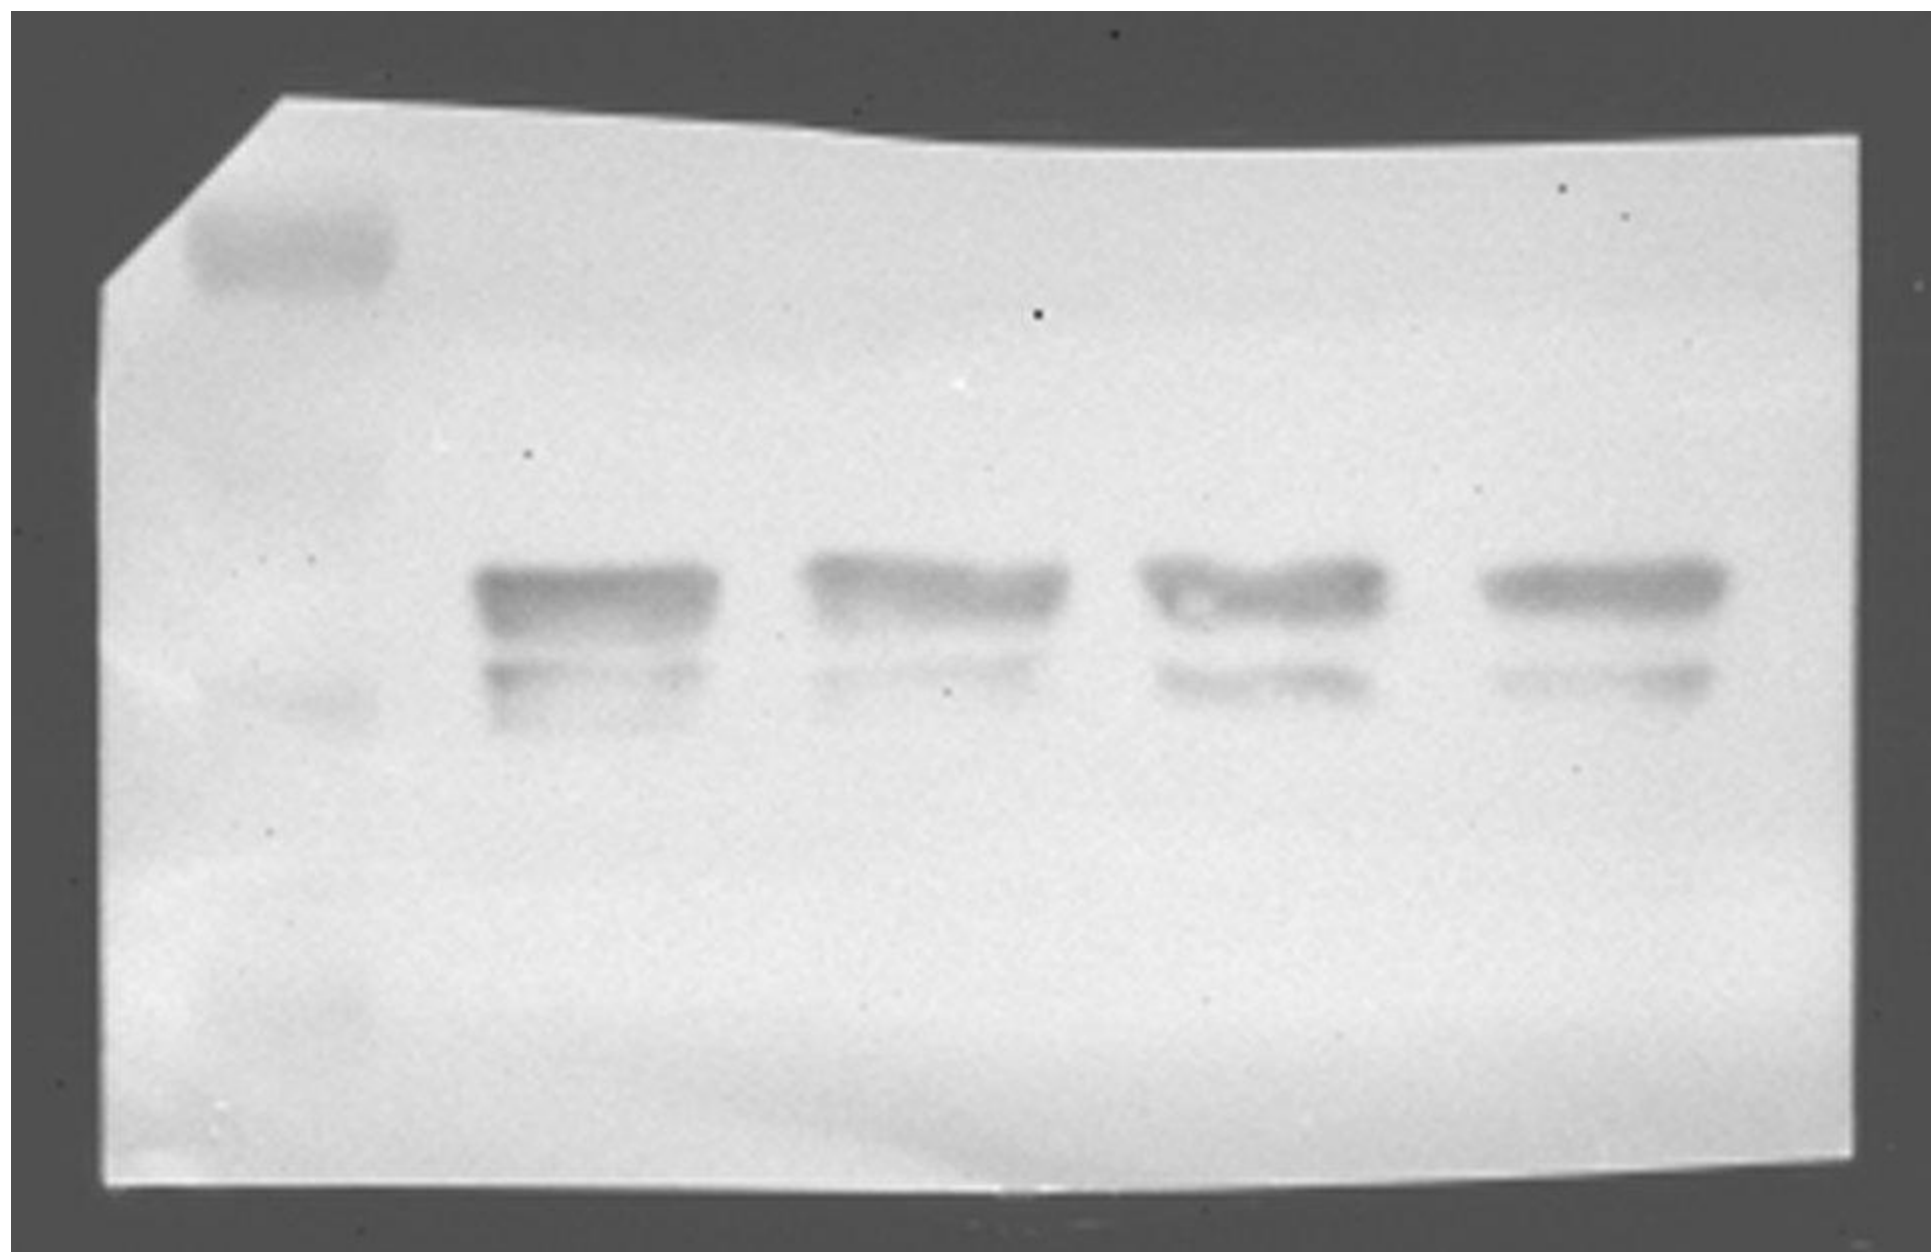

Supplement: fig3-data2 [file elife-95229-fig3-data2-v1.zip]

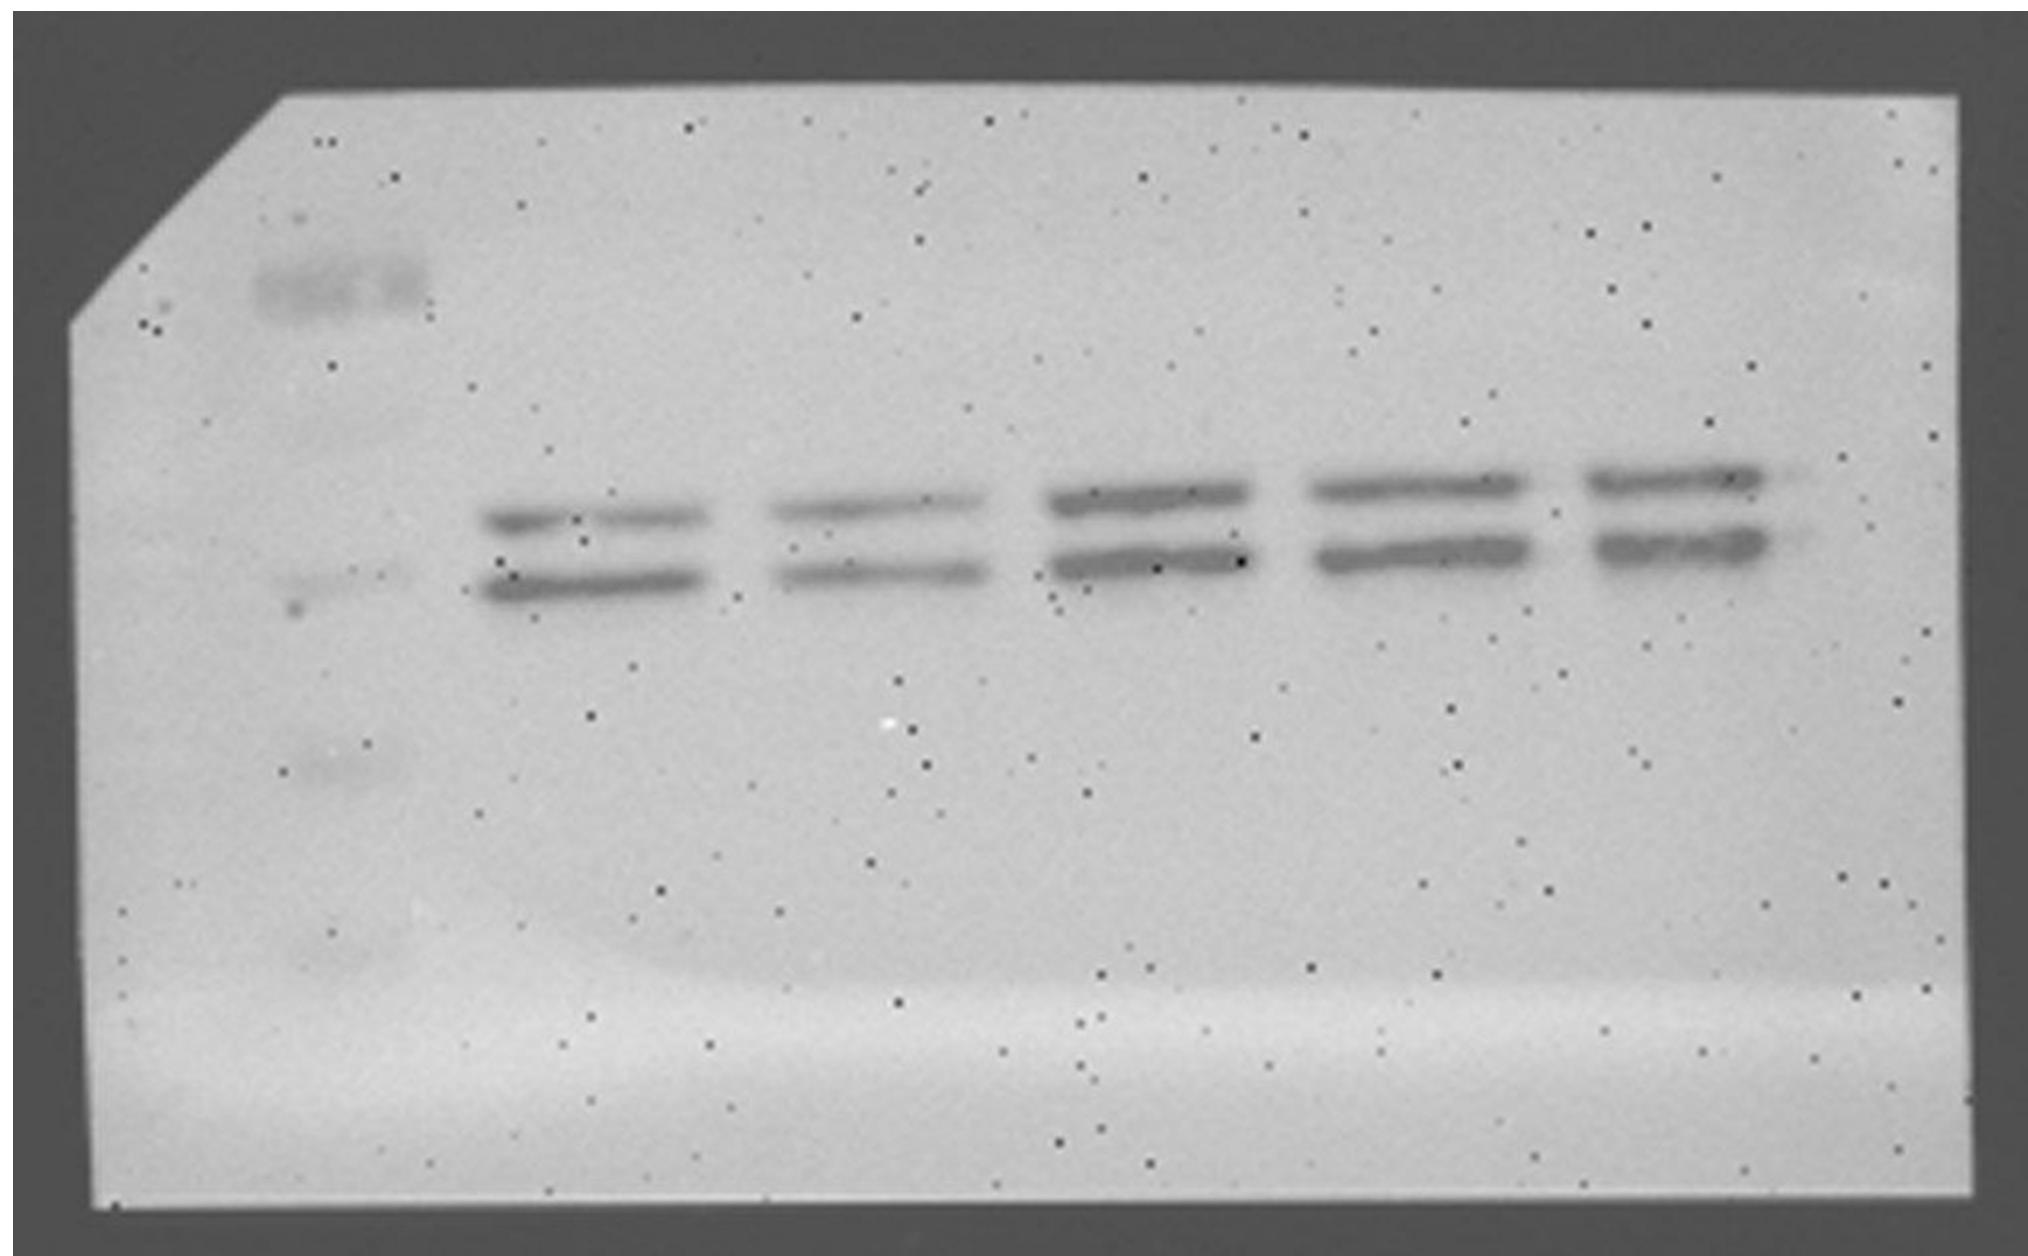

Supplement: fig3-data2 [file elife-95229-fig3-data2-v1.zip]

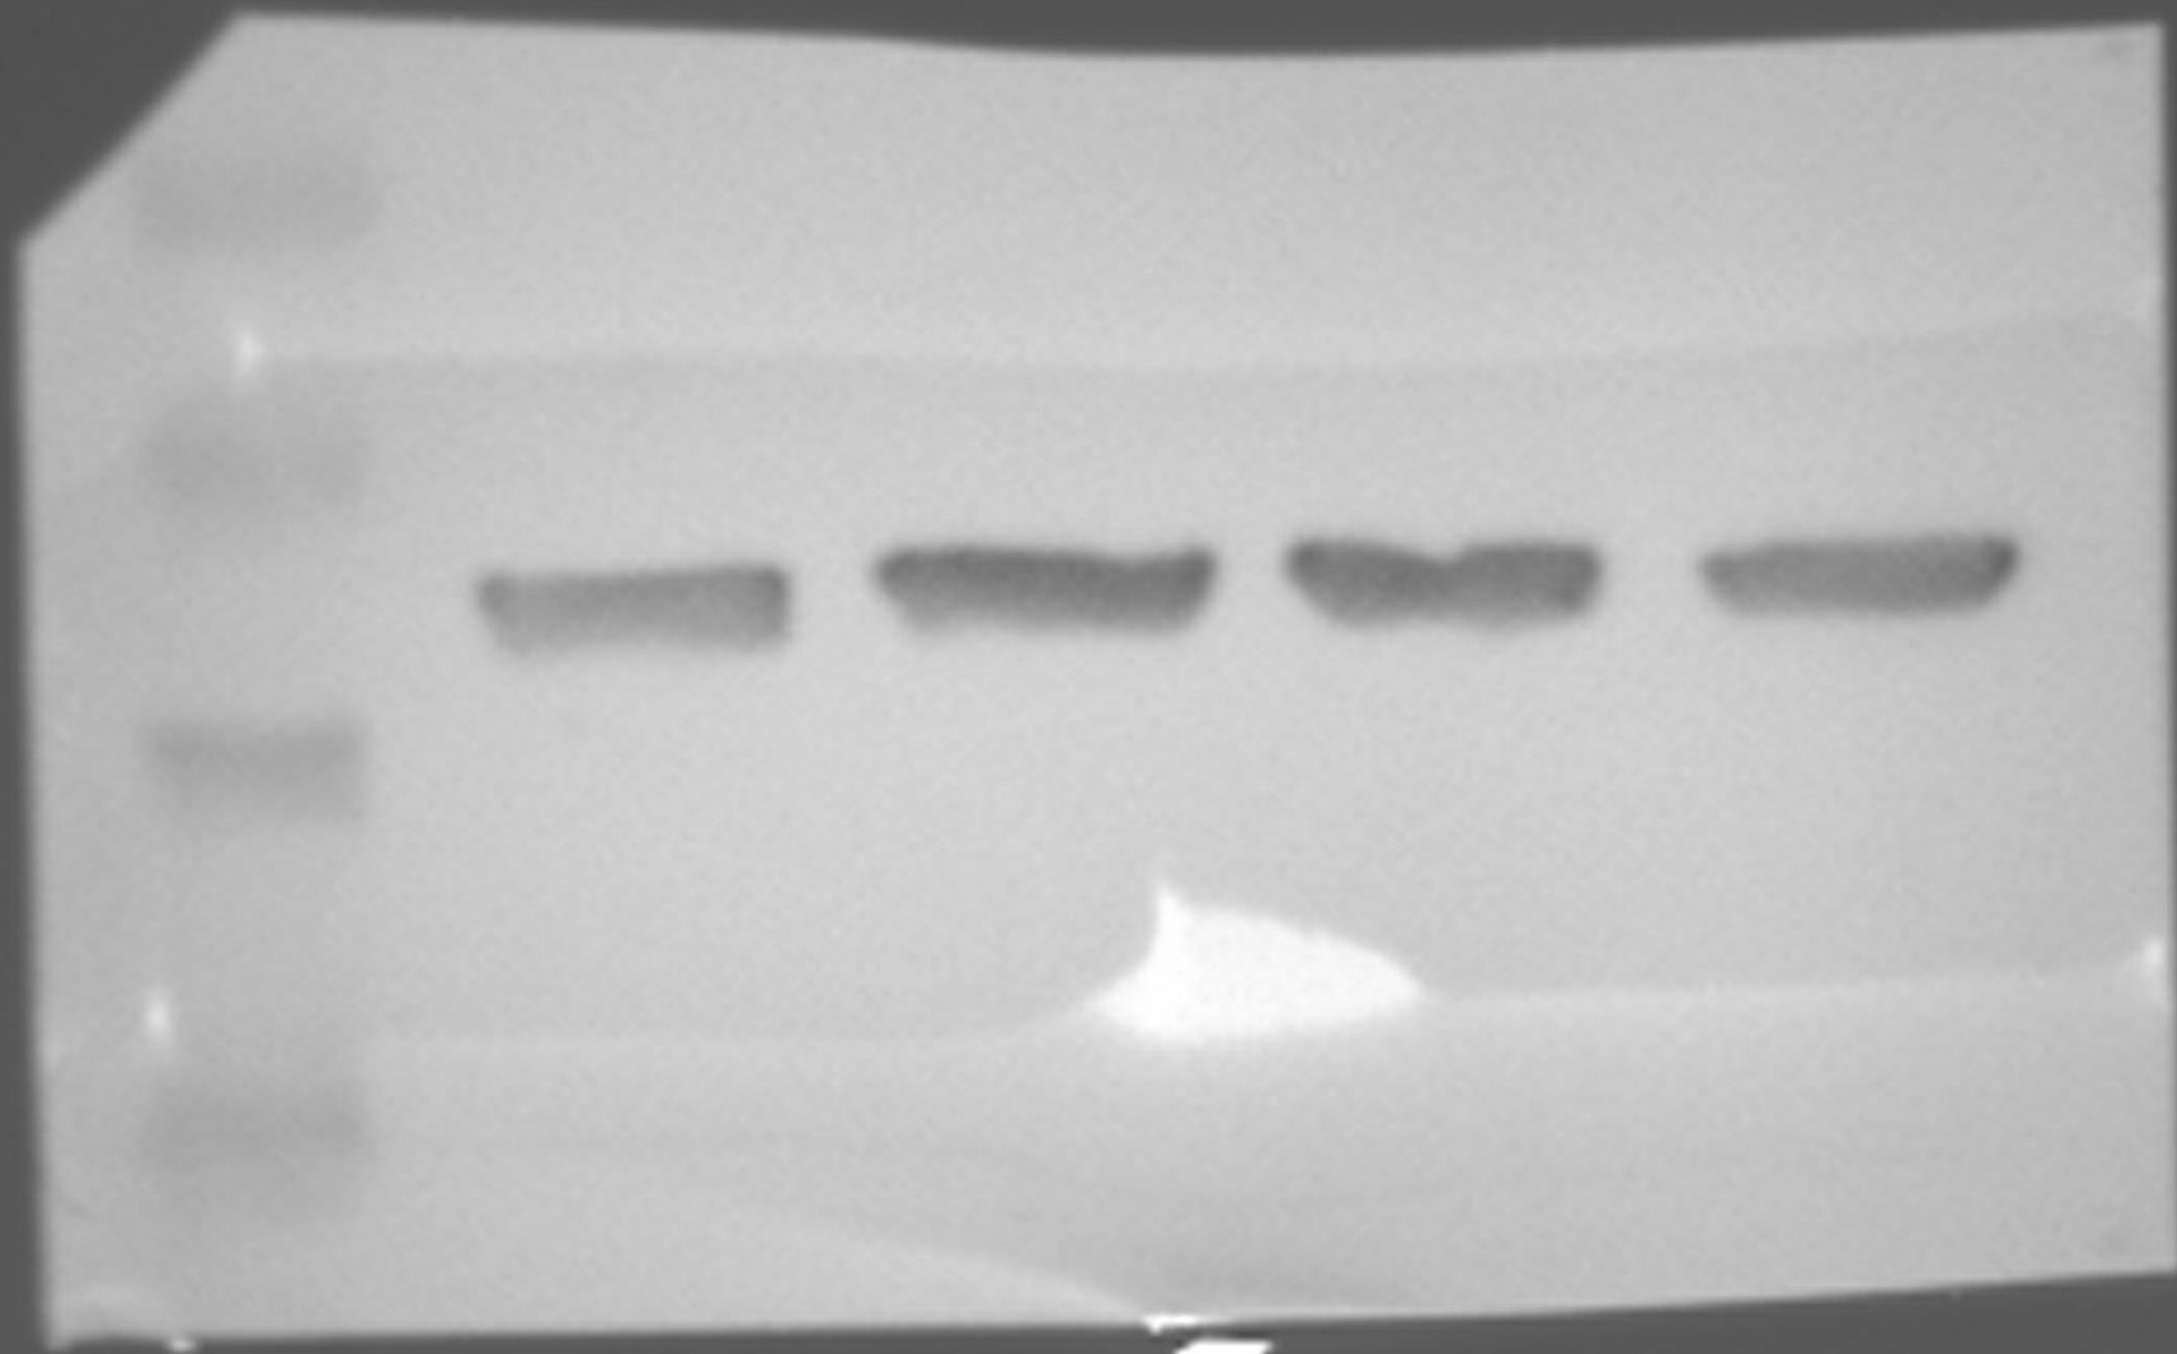

Supplement: fig3-data2 [file elife-95229-fig3-data2-v1.zip]

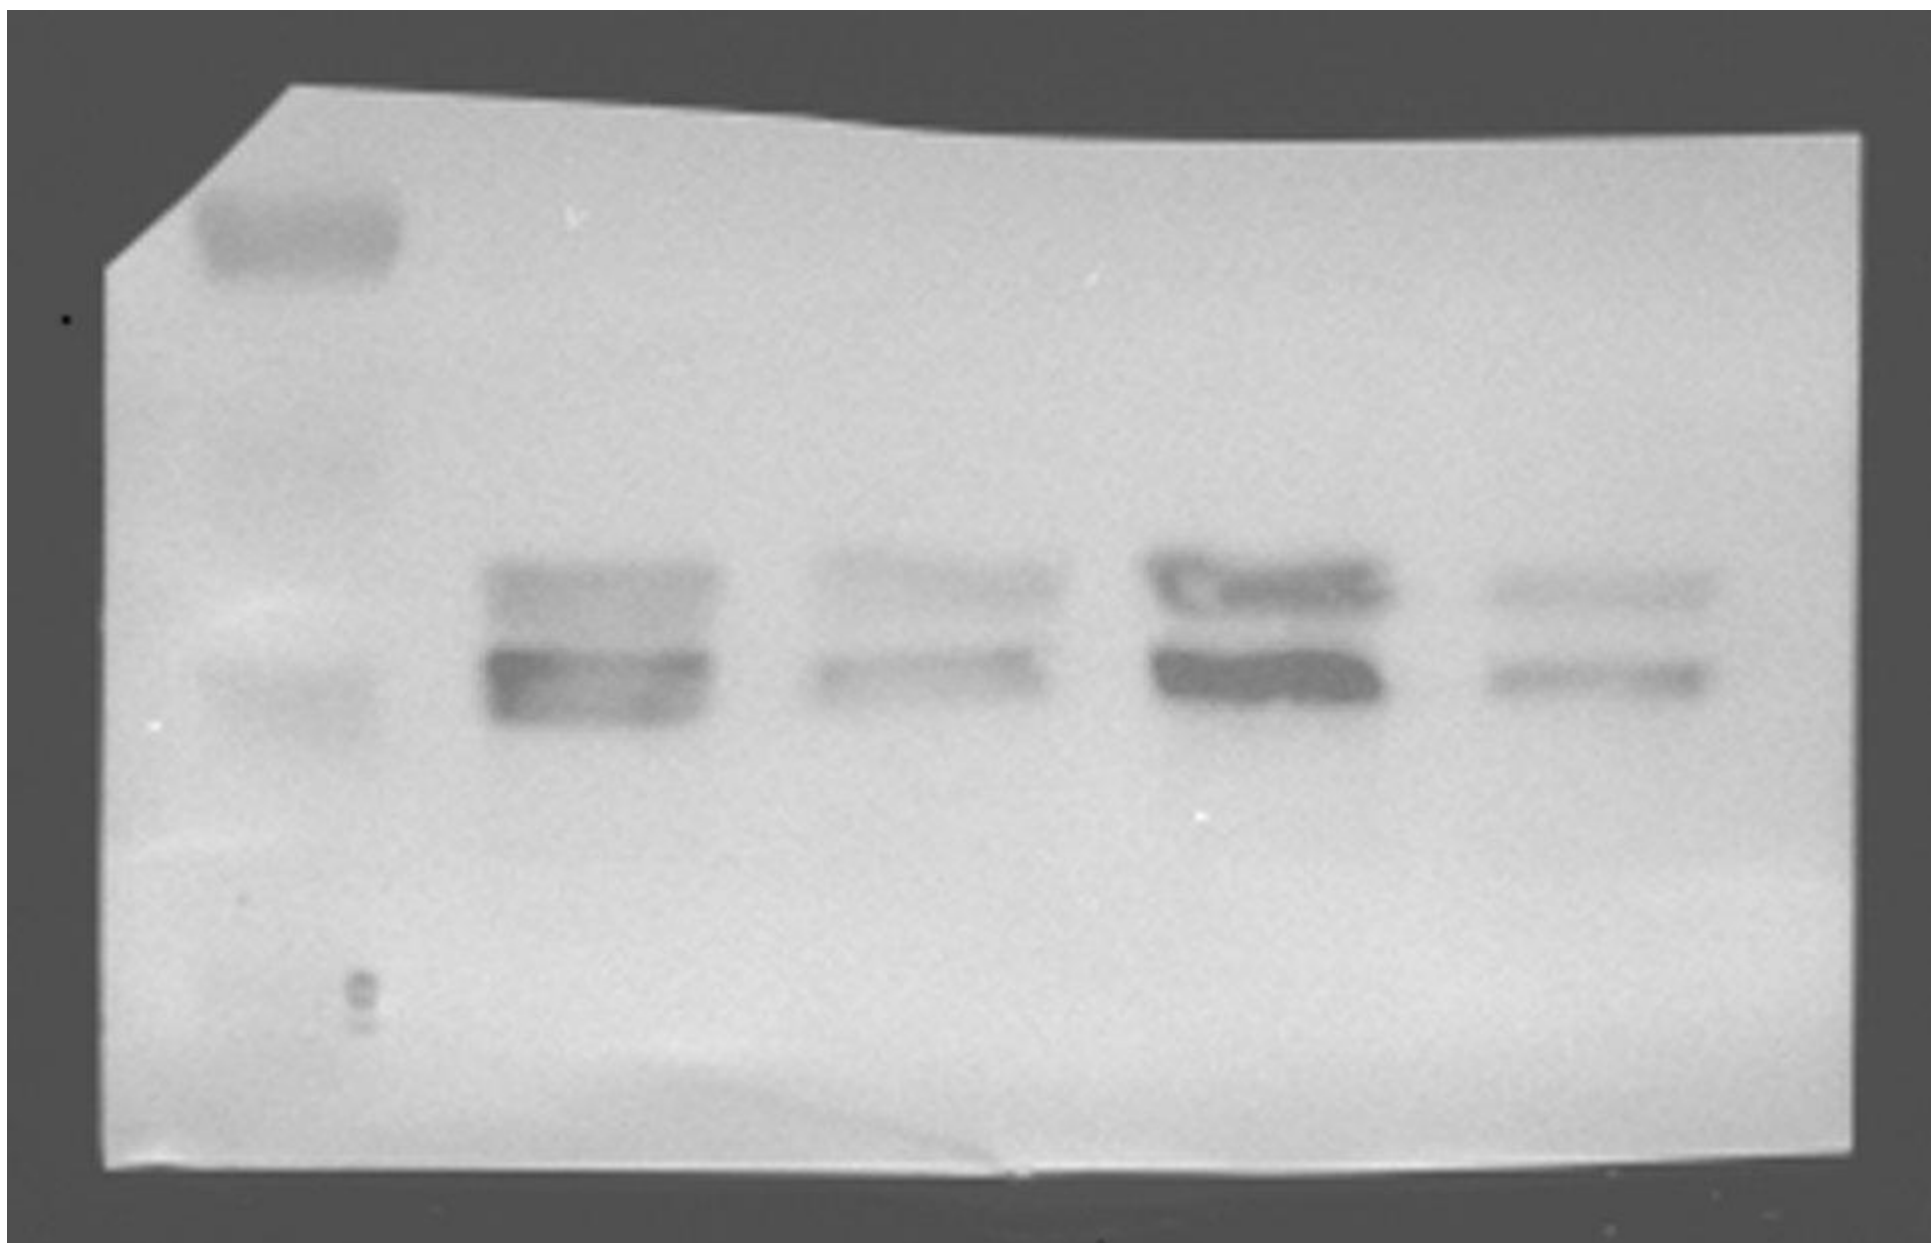

Supplement: fig3-data2 [file elife-95229-fig3-data2-v1.zip]

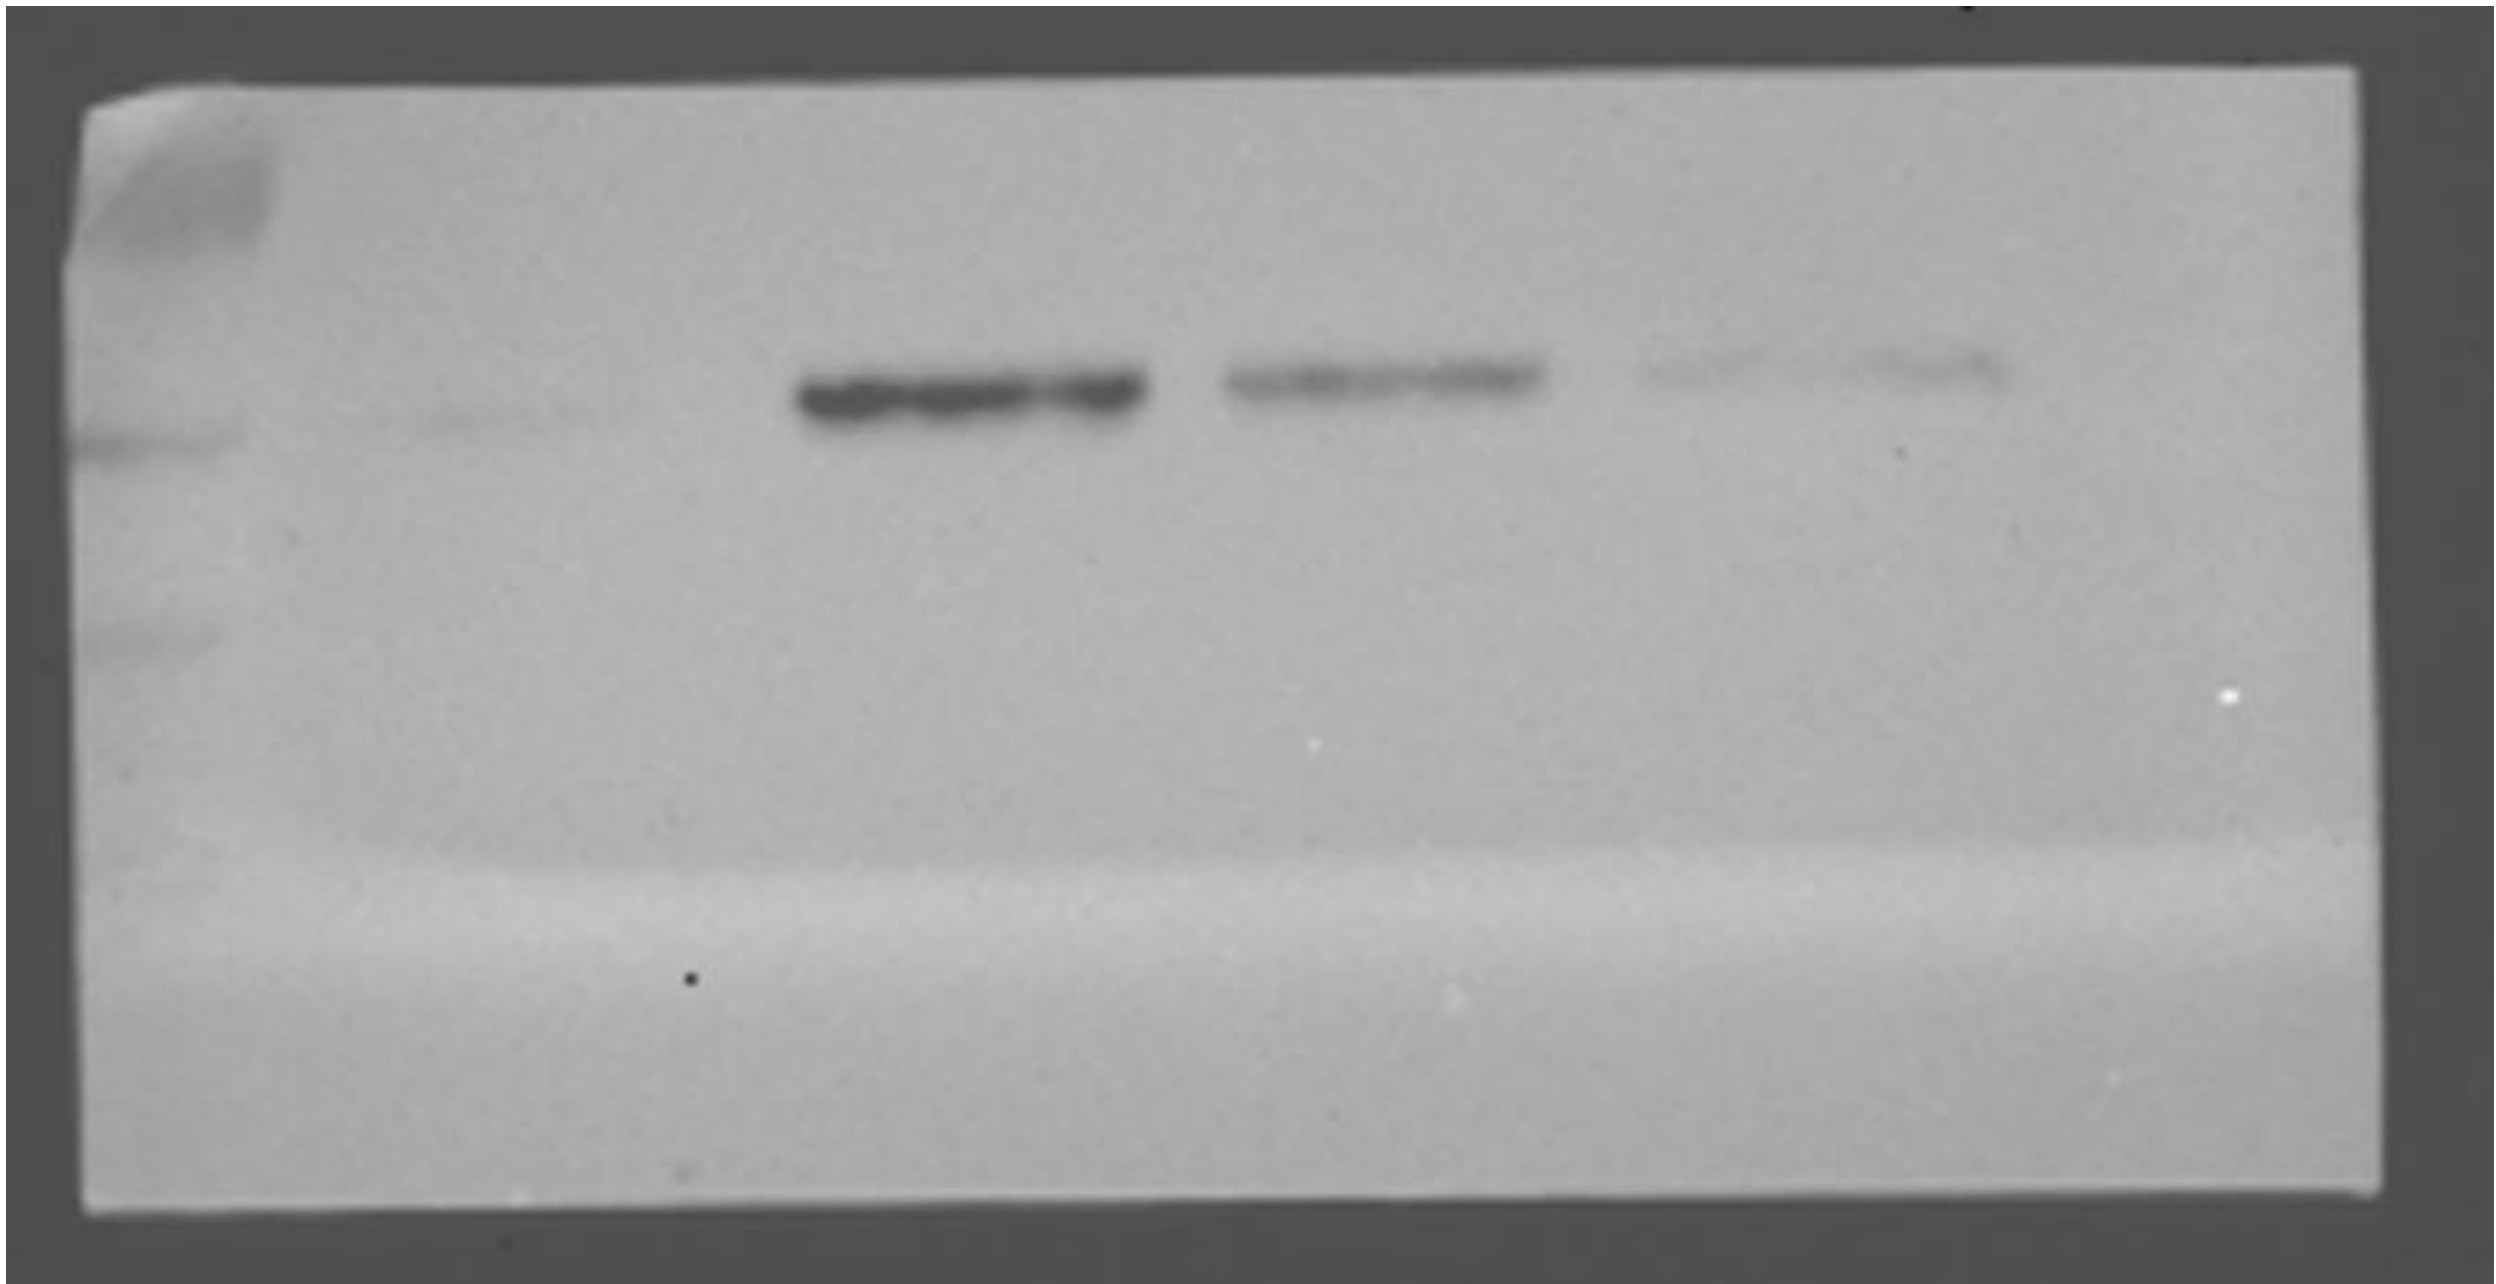

Supplement: fig3-data2 [file elife-95229-fig3-data2-v1.zip]

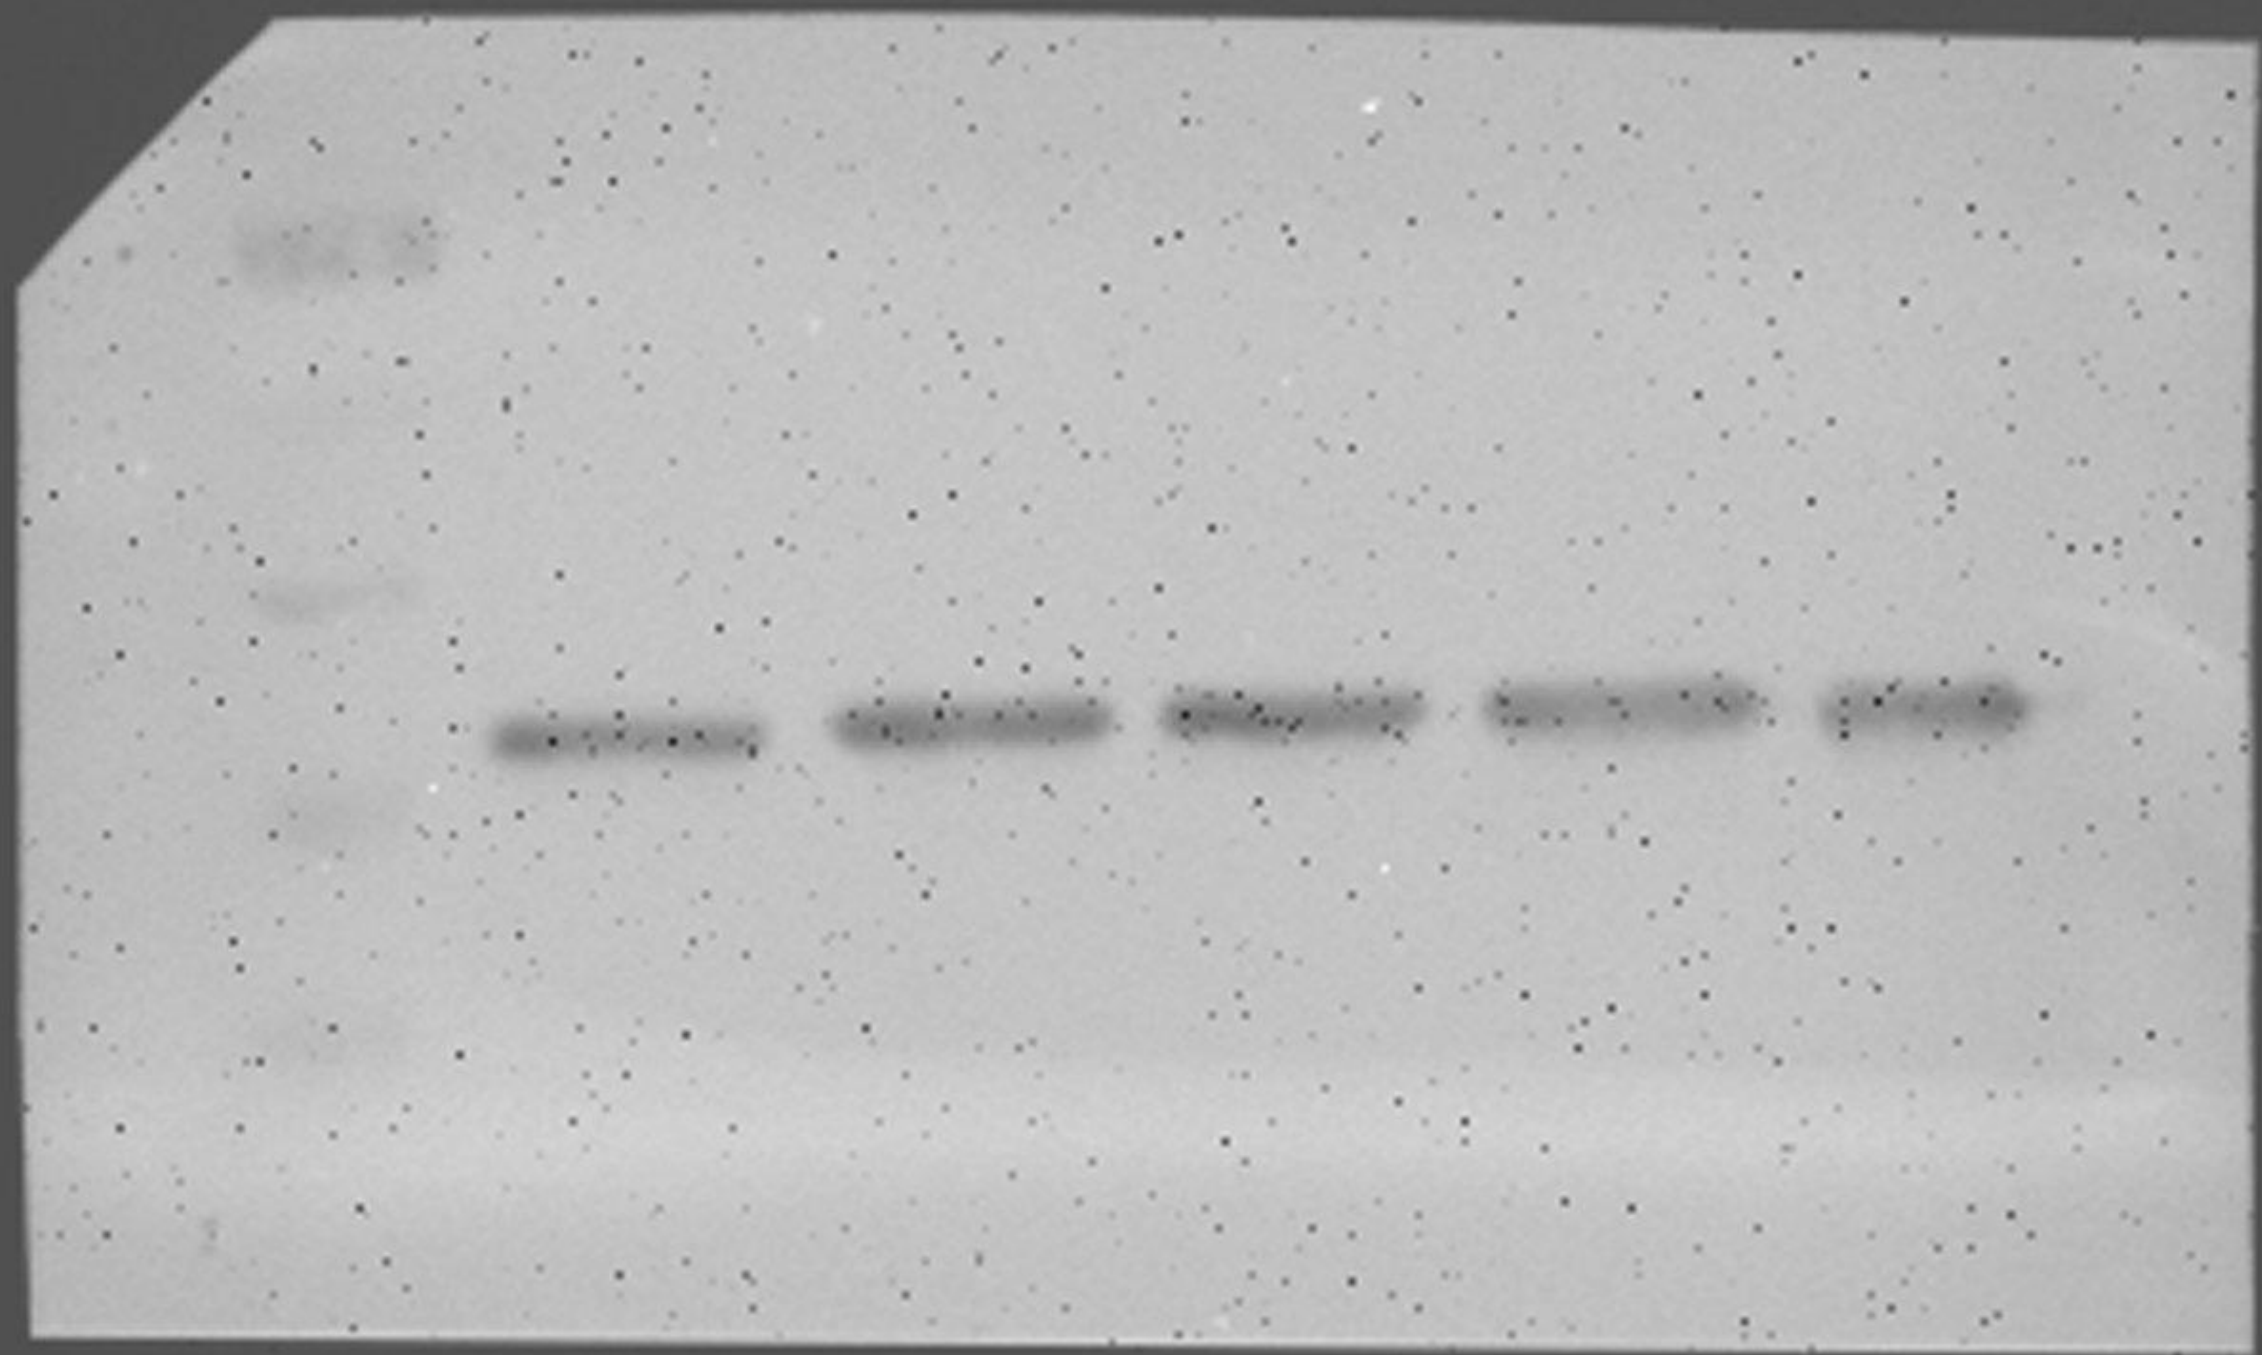

Supplement: fig3-data2 [file elife-95229-fig3-data2-v1.zip]

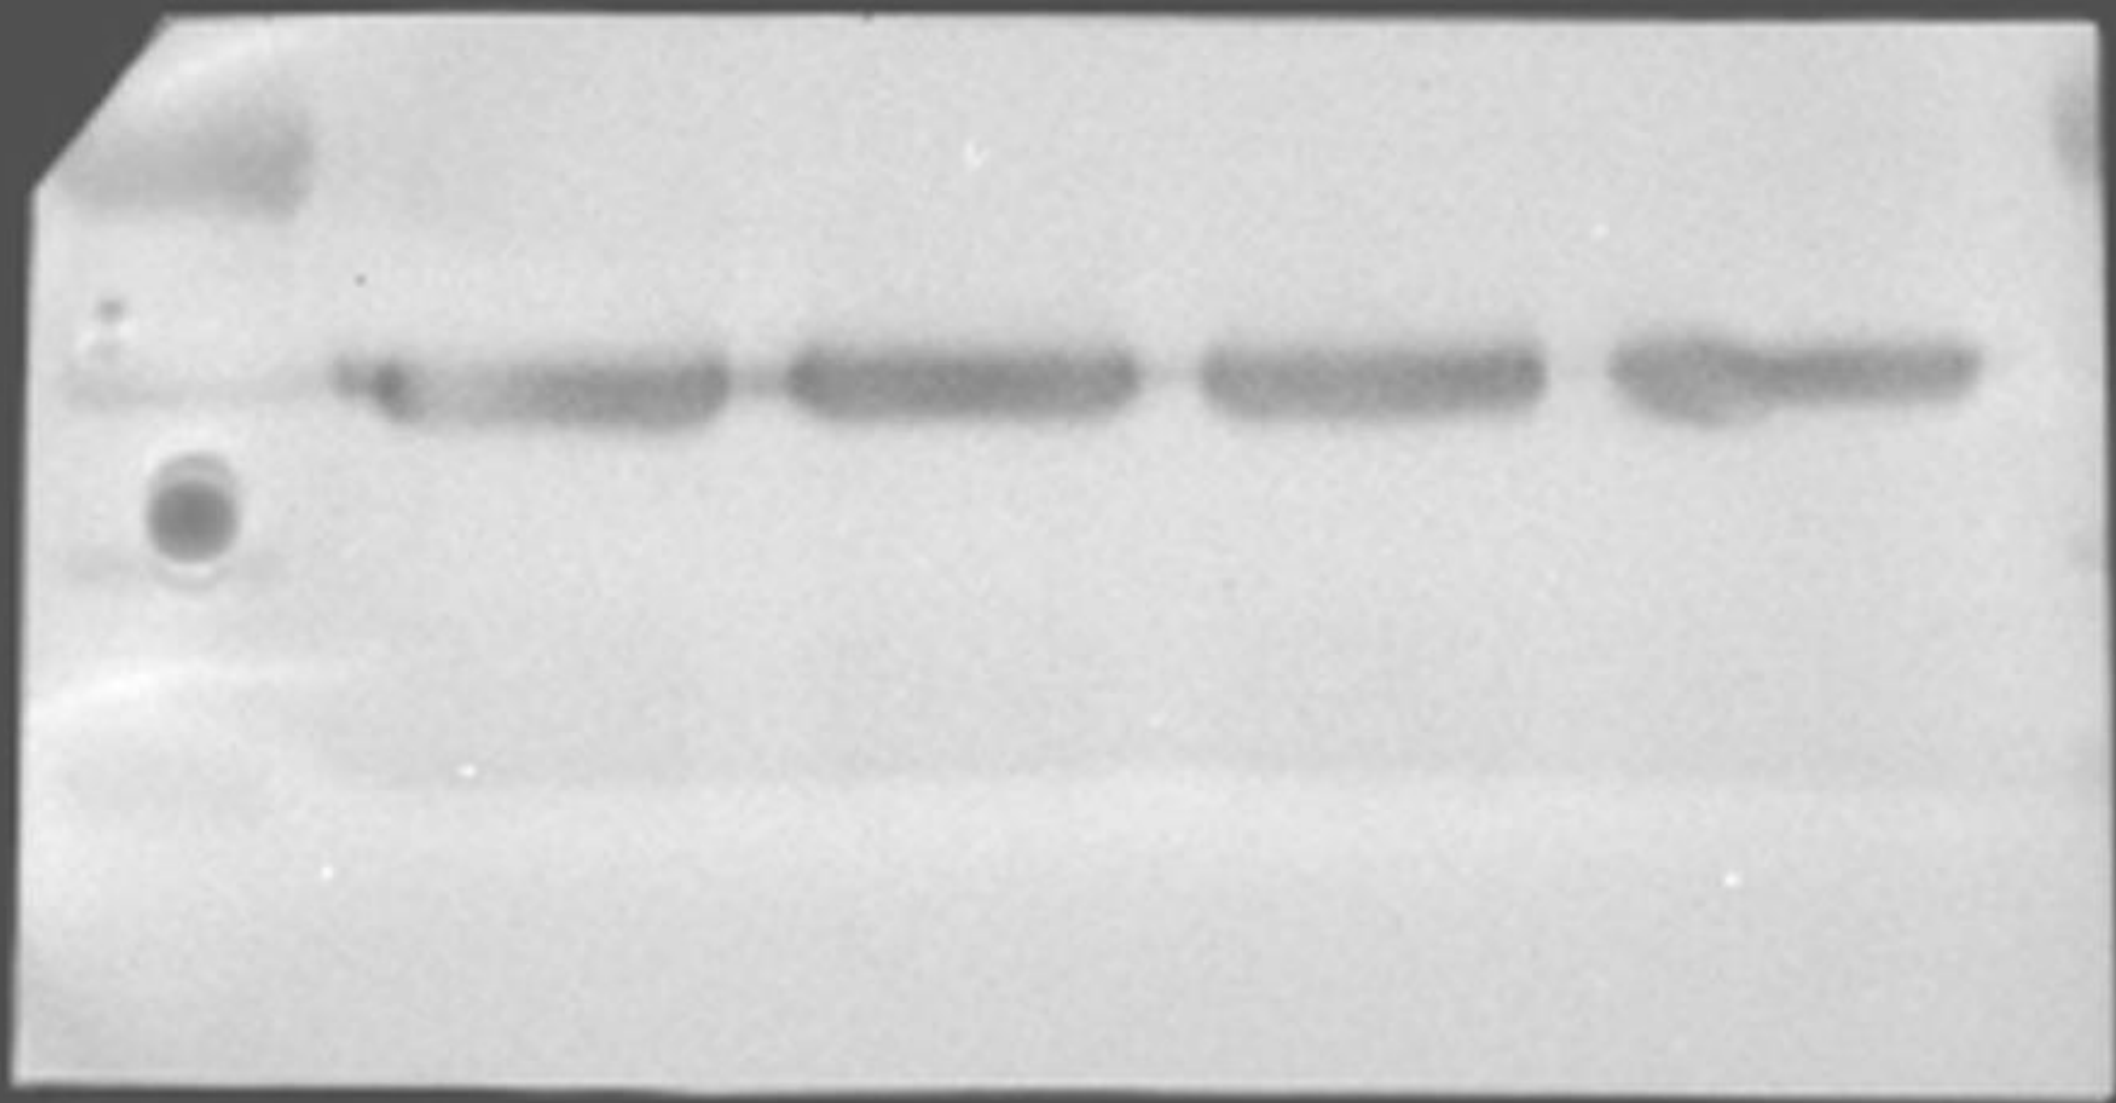

Supplement: fig3-data2 [file elife-95229-fig3-data2-v1.zip]

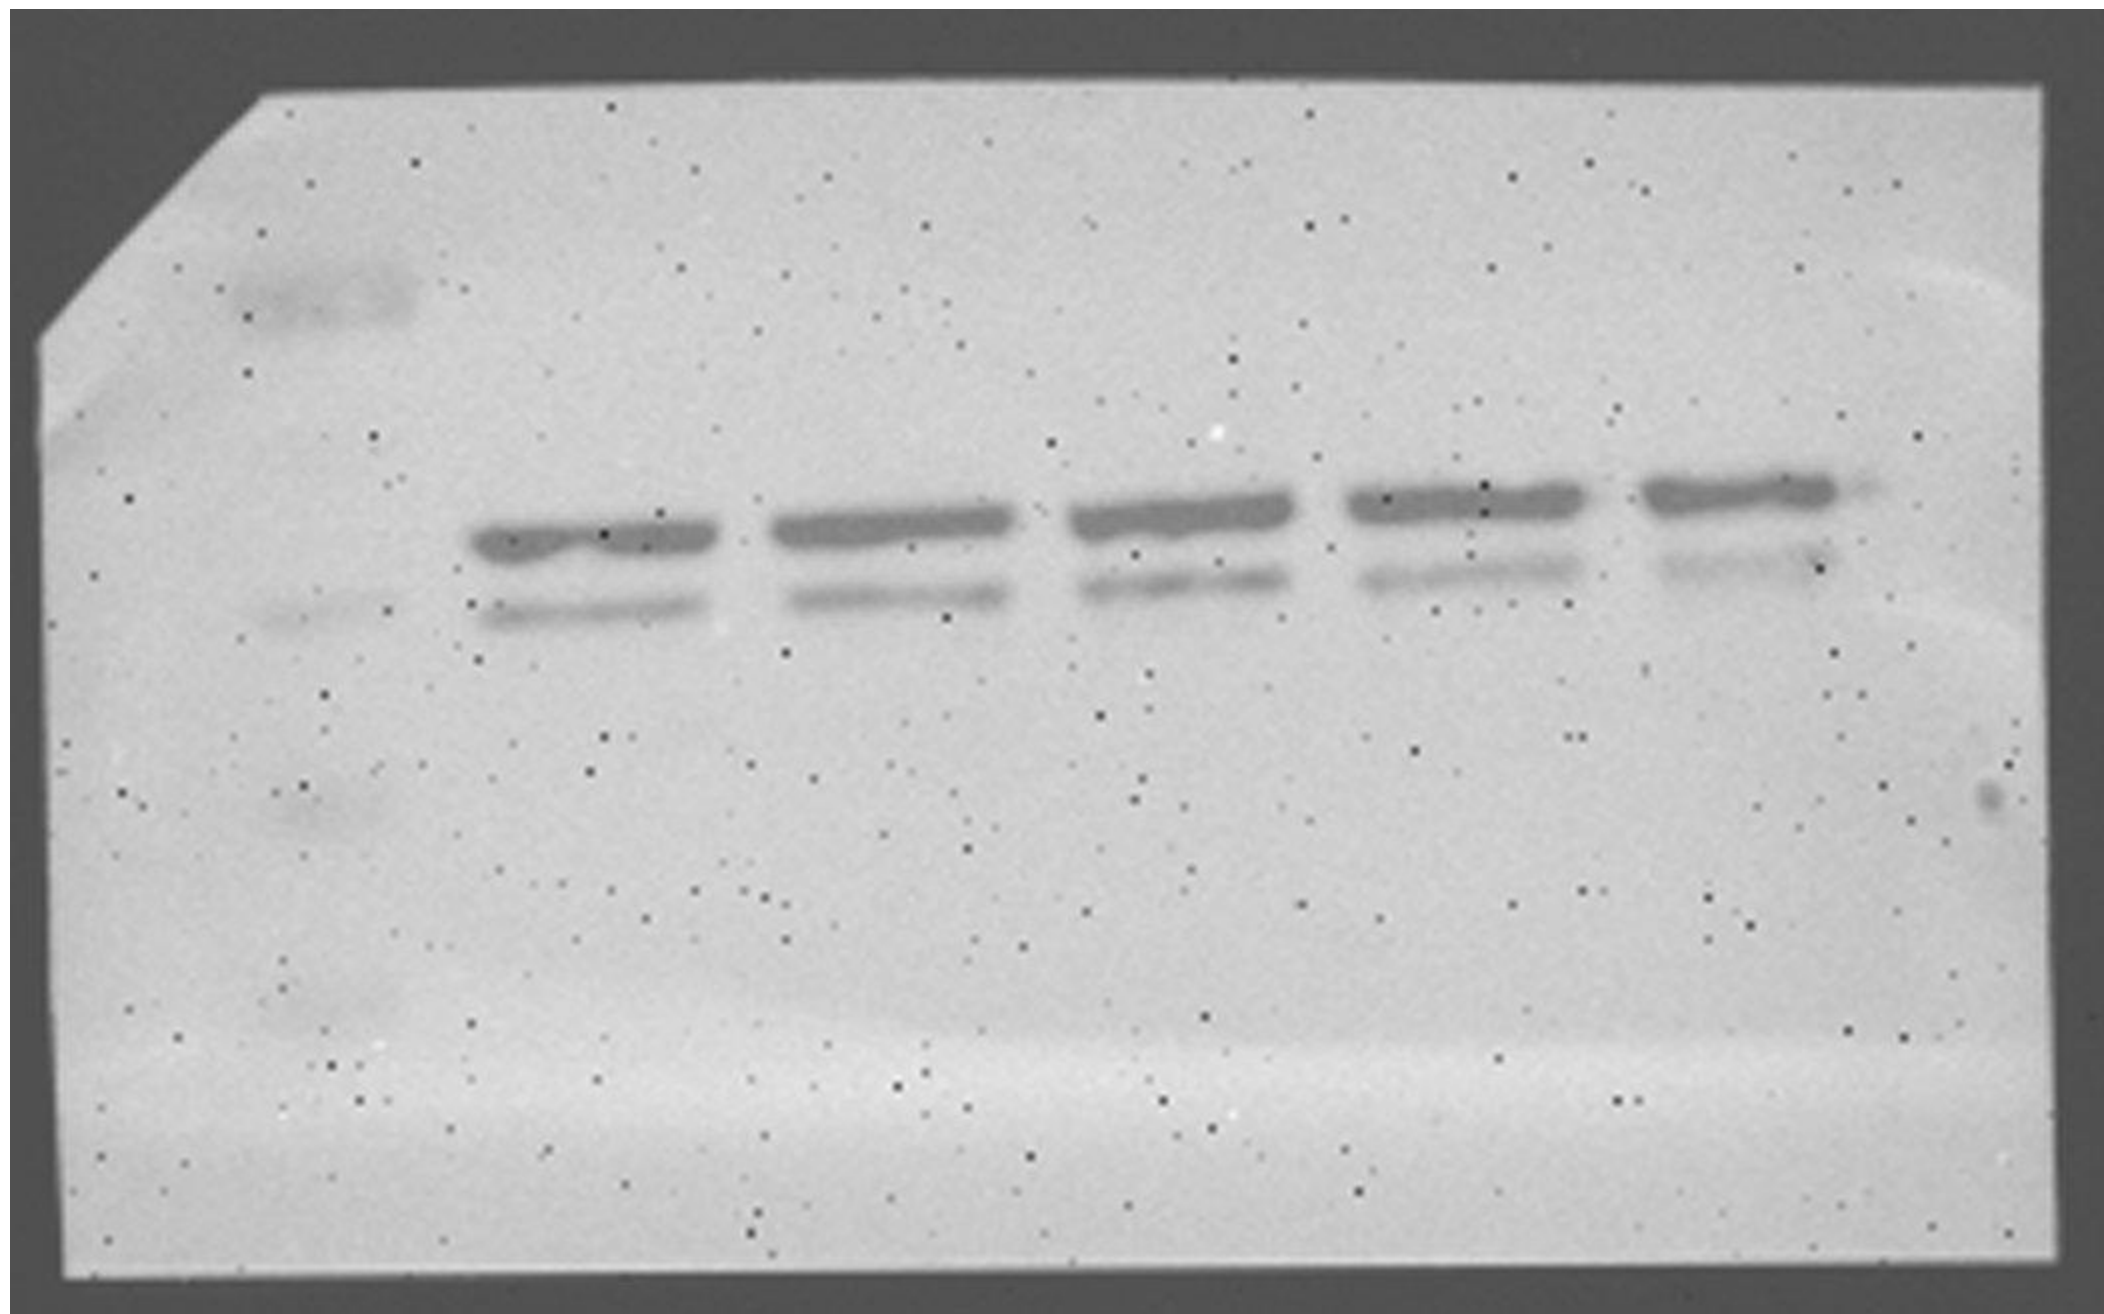

Supplement: fig3-data2 [file elife-95229-fig3-data2-v1.zip]

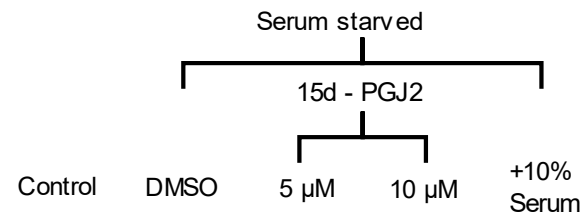

70 kDa  
50 kDa  
42 kDa

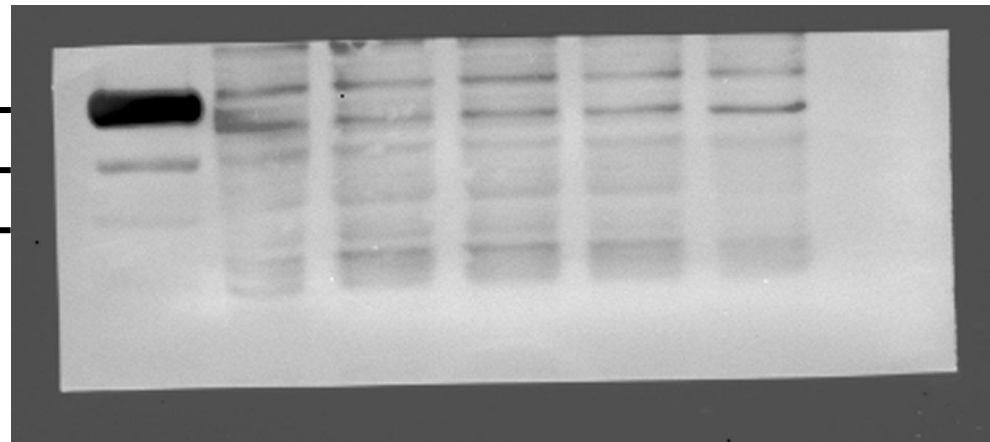

phosphoAkt

70 kDa  
50 kDa  
42 kDa

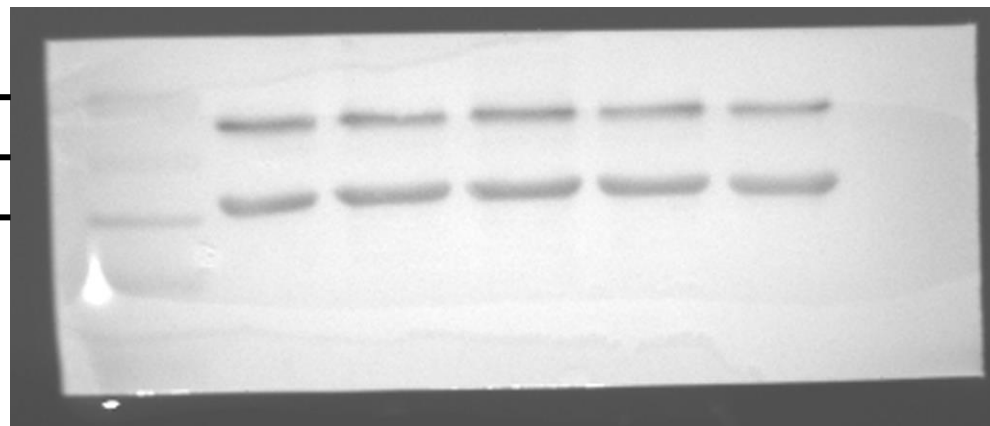

Akt  
 $\beta$ -Actin

Supplement: fig3-figsupp1-data1 [file elife-95229-fig3-figsupp1-data1-v1.zip]

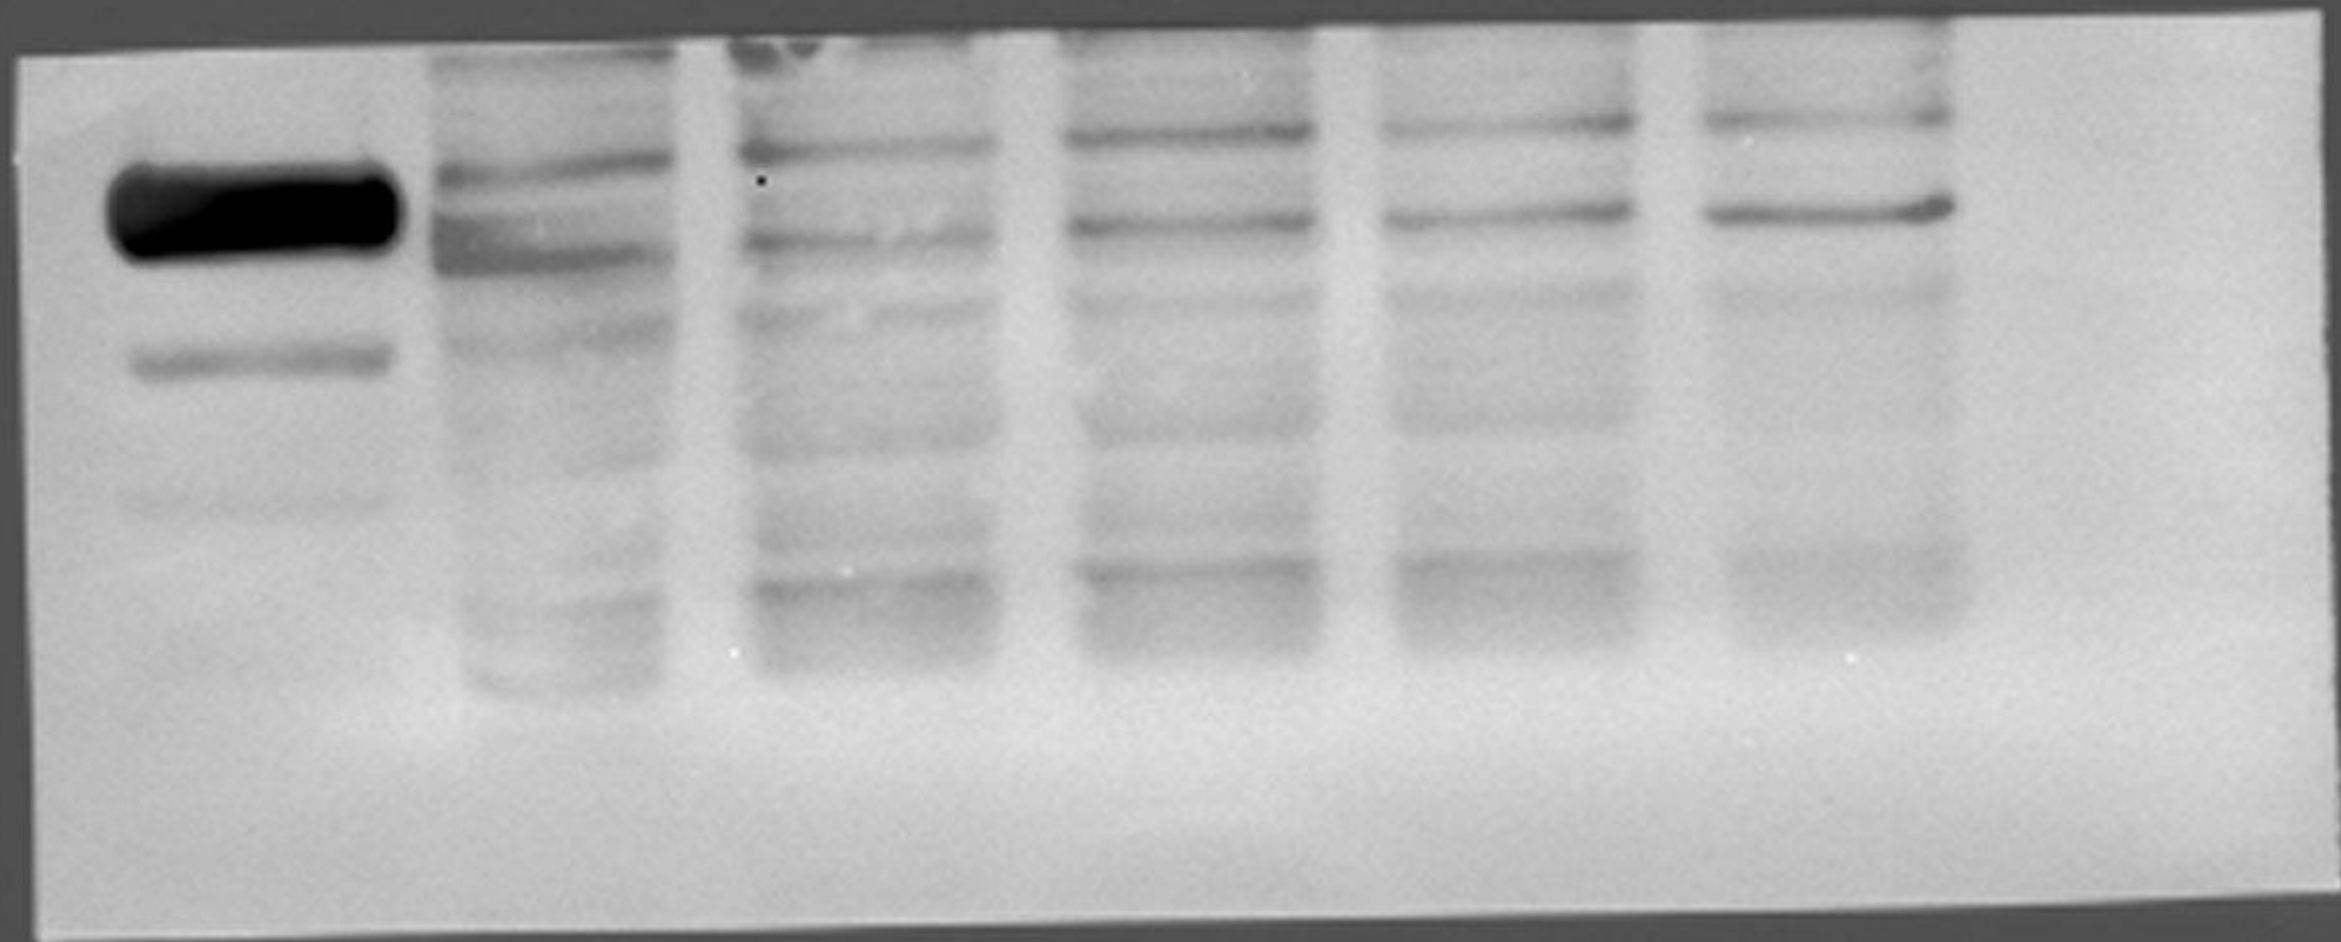

Supplement: fig3-figsupp1-data2 [file elife-95229-fig3-figsupp1-data2-v1.zip]

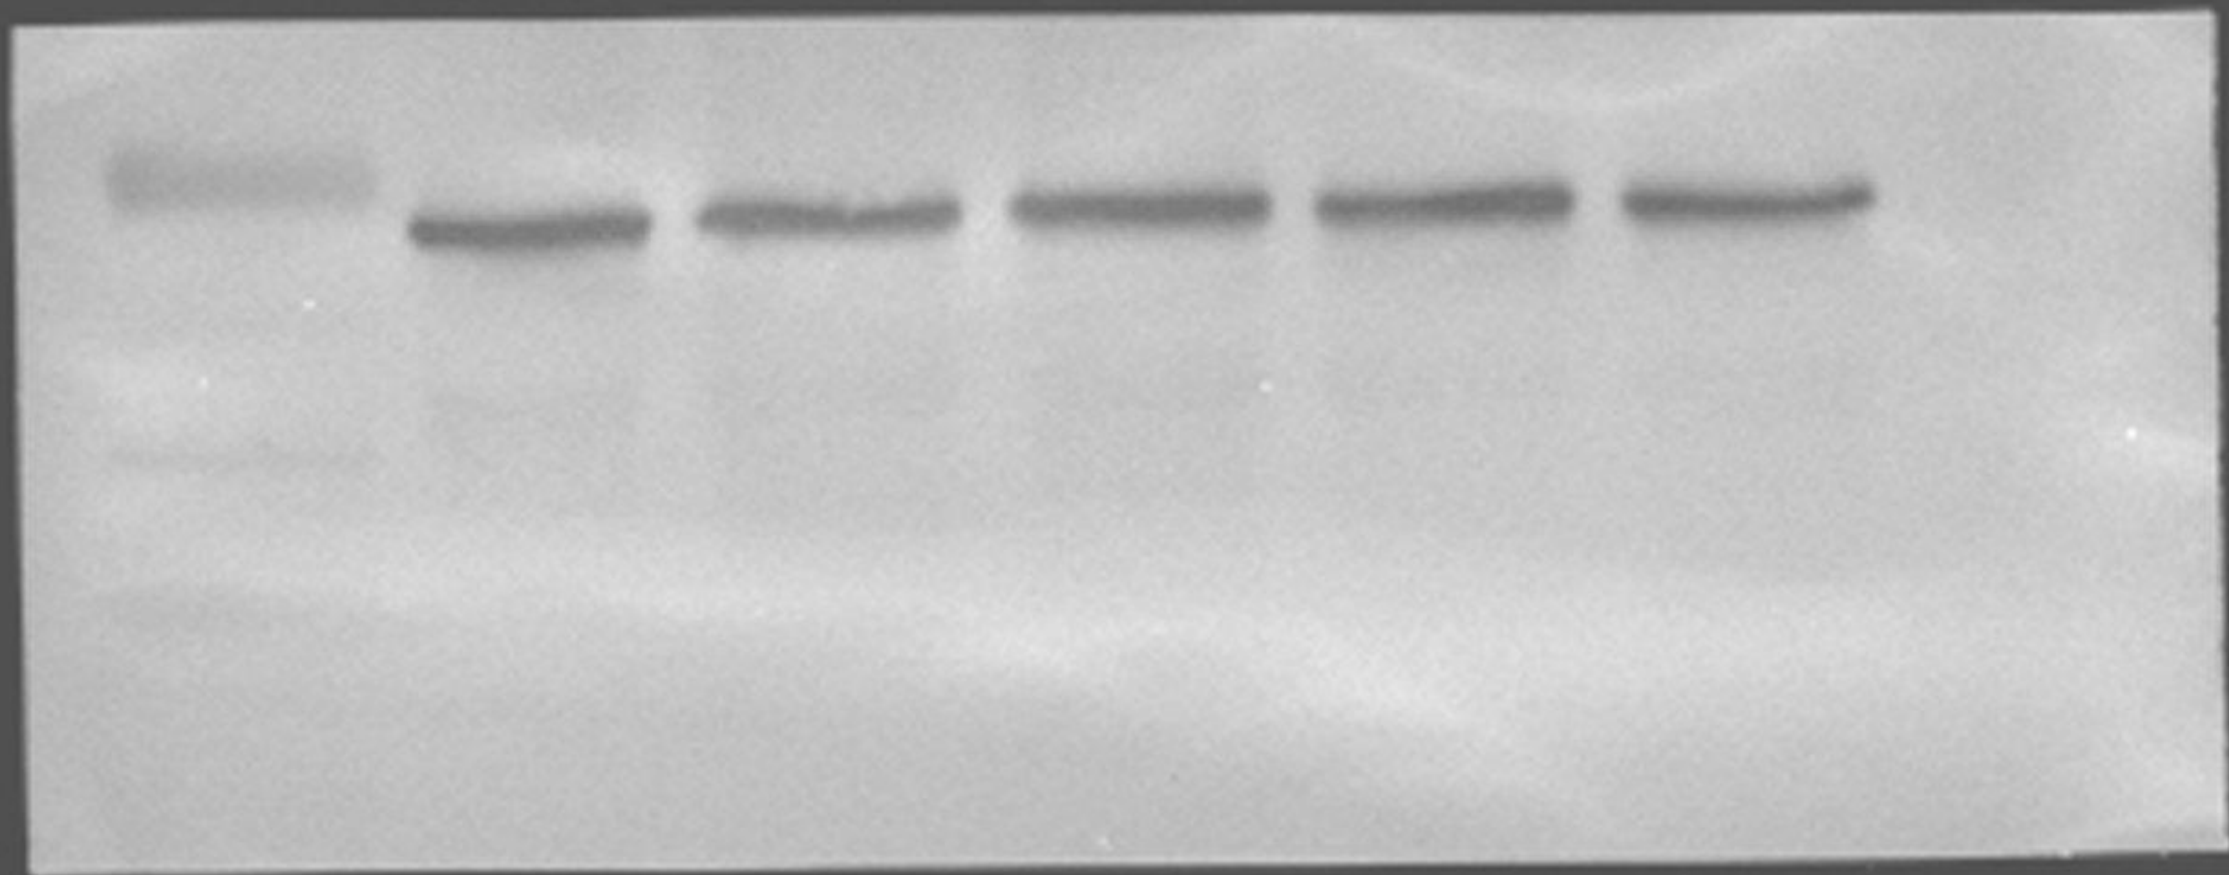

Supplement: fig3-figsupp1-data2 [file elife-95229-fig3-figsupp1-data2-v1.zip]

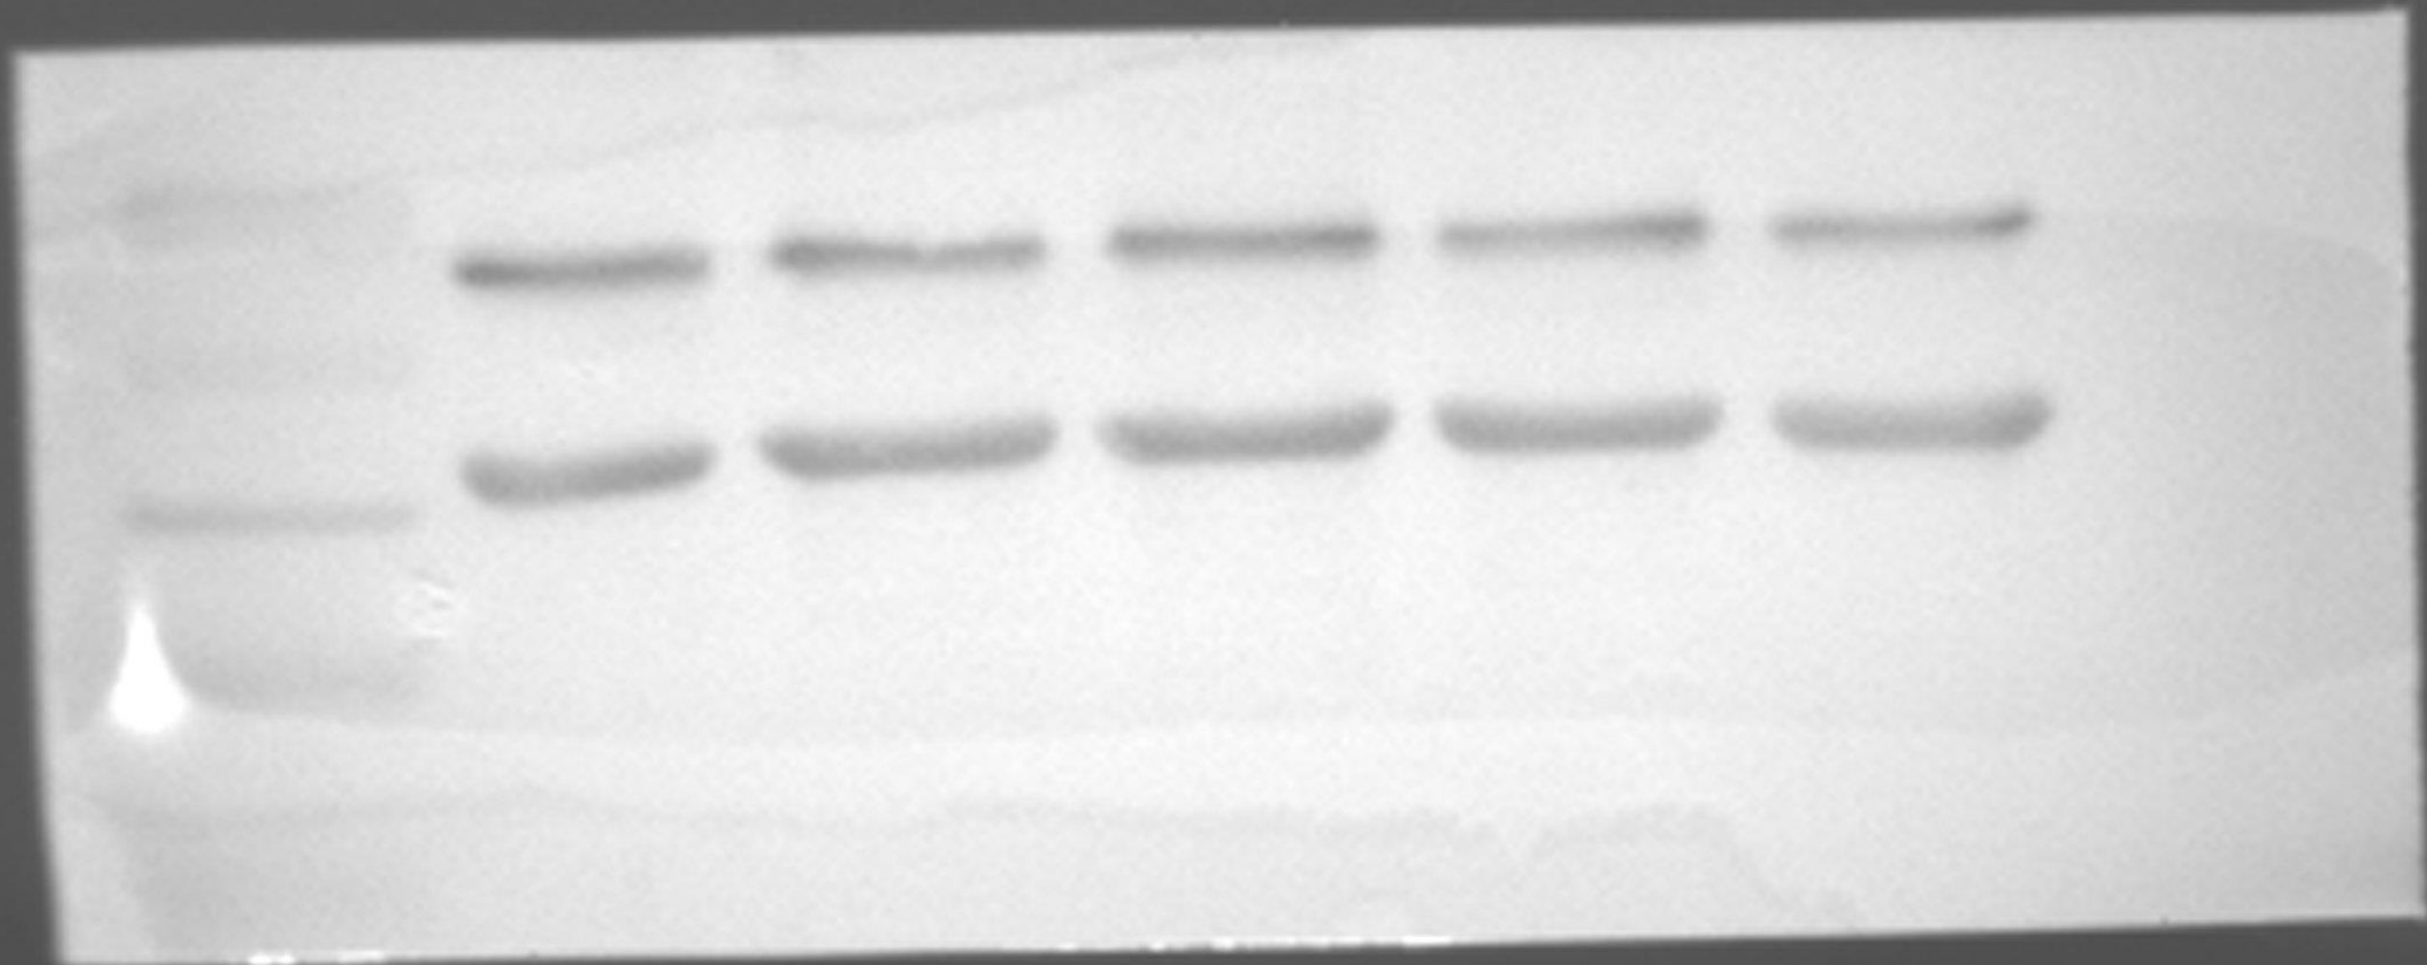

Supplement: fig3-figsupp1-data2 [file elife-95229-fig3-figsupp1-data2-v1.zip]

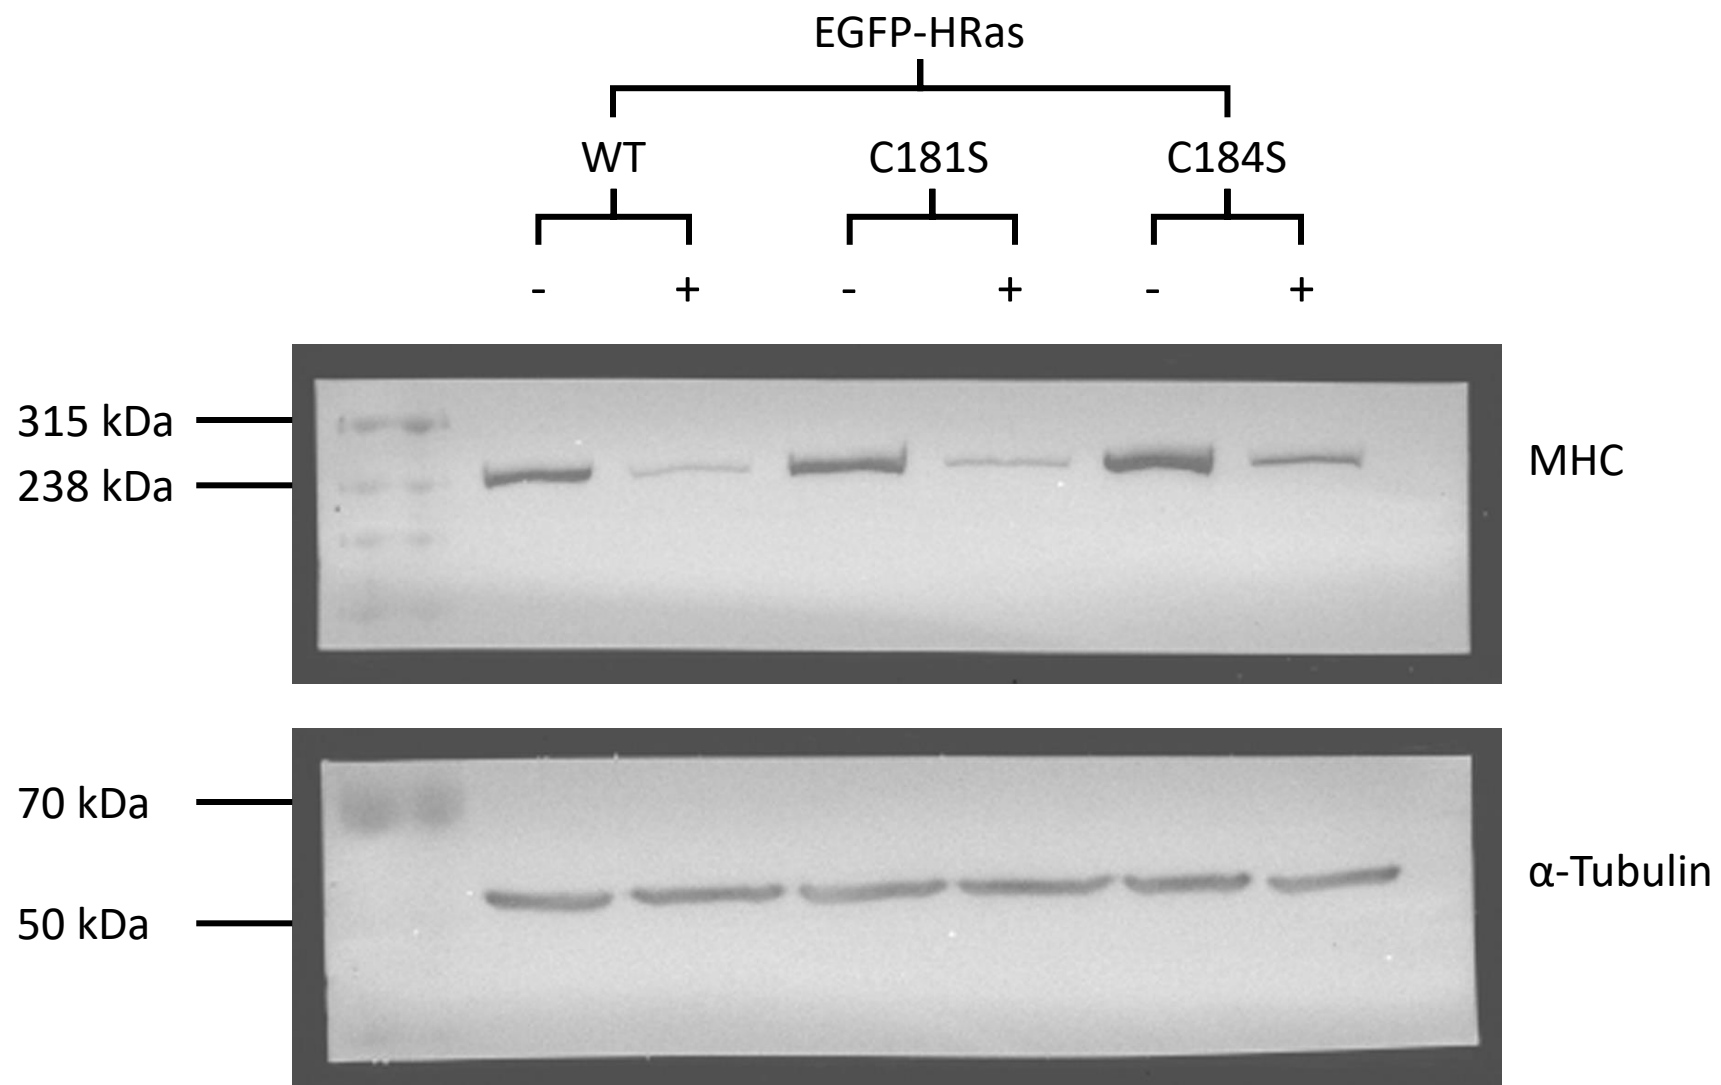

Supplement: fig4-data1 [file elife-95229-fig4-data1-v1.zip]

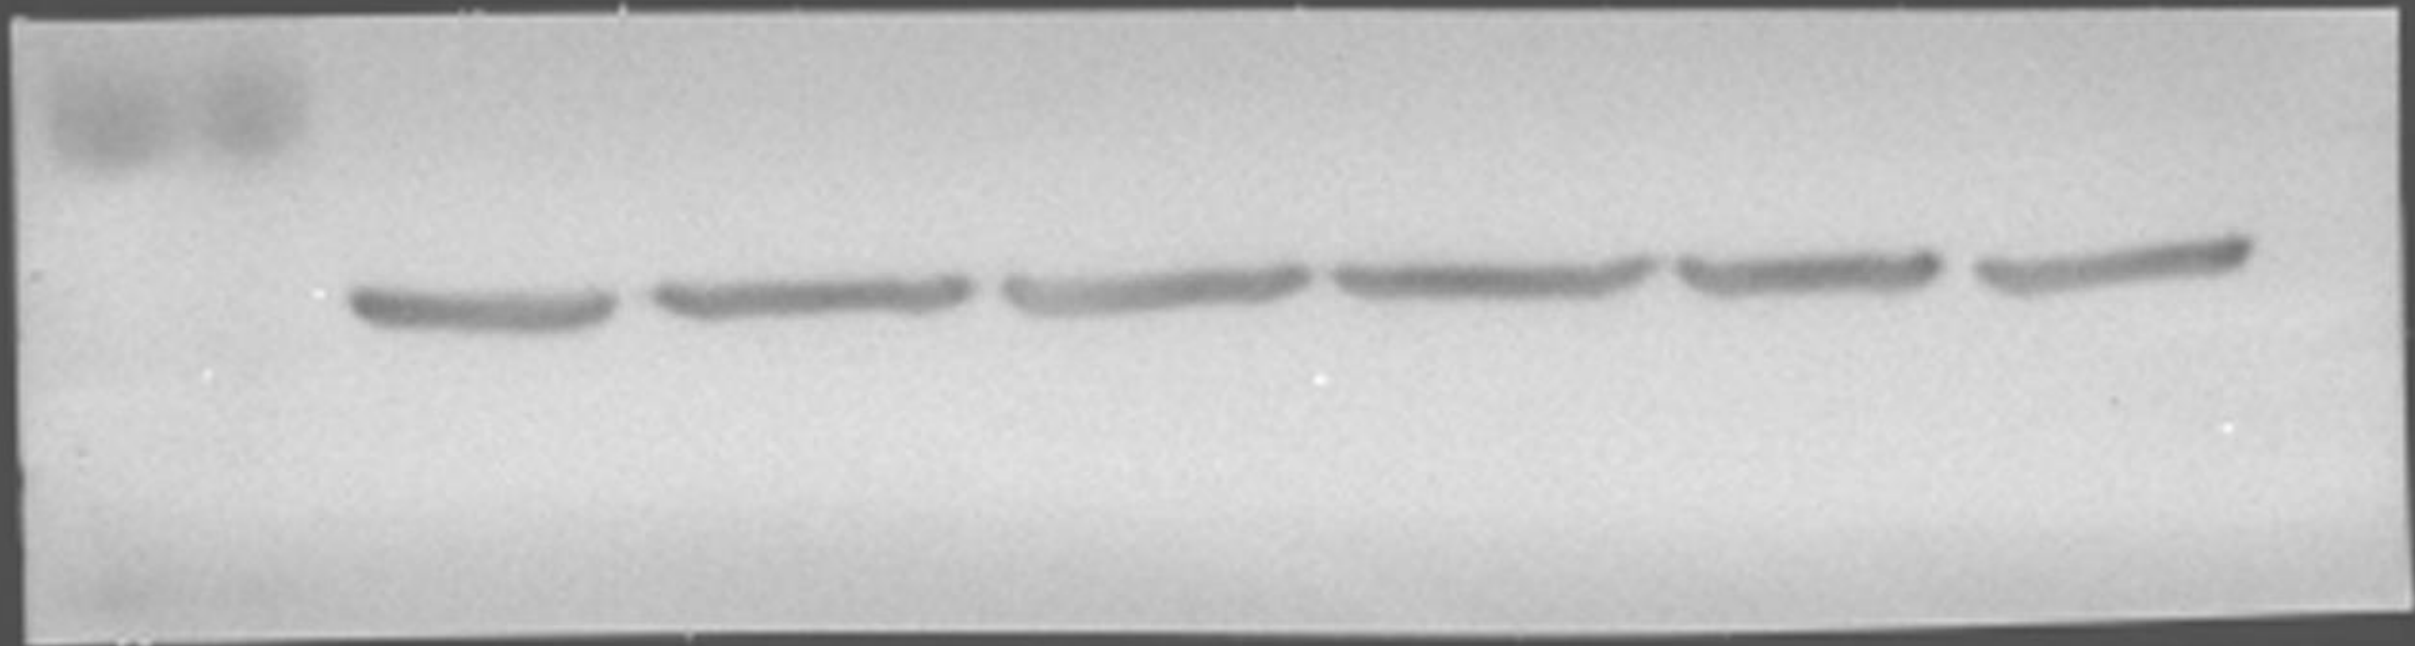

Supplement: fig4-data2 [file elife-95229-fig4-data2-v1.zip]

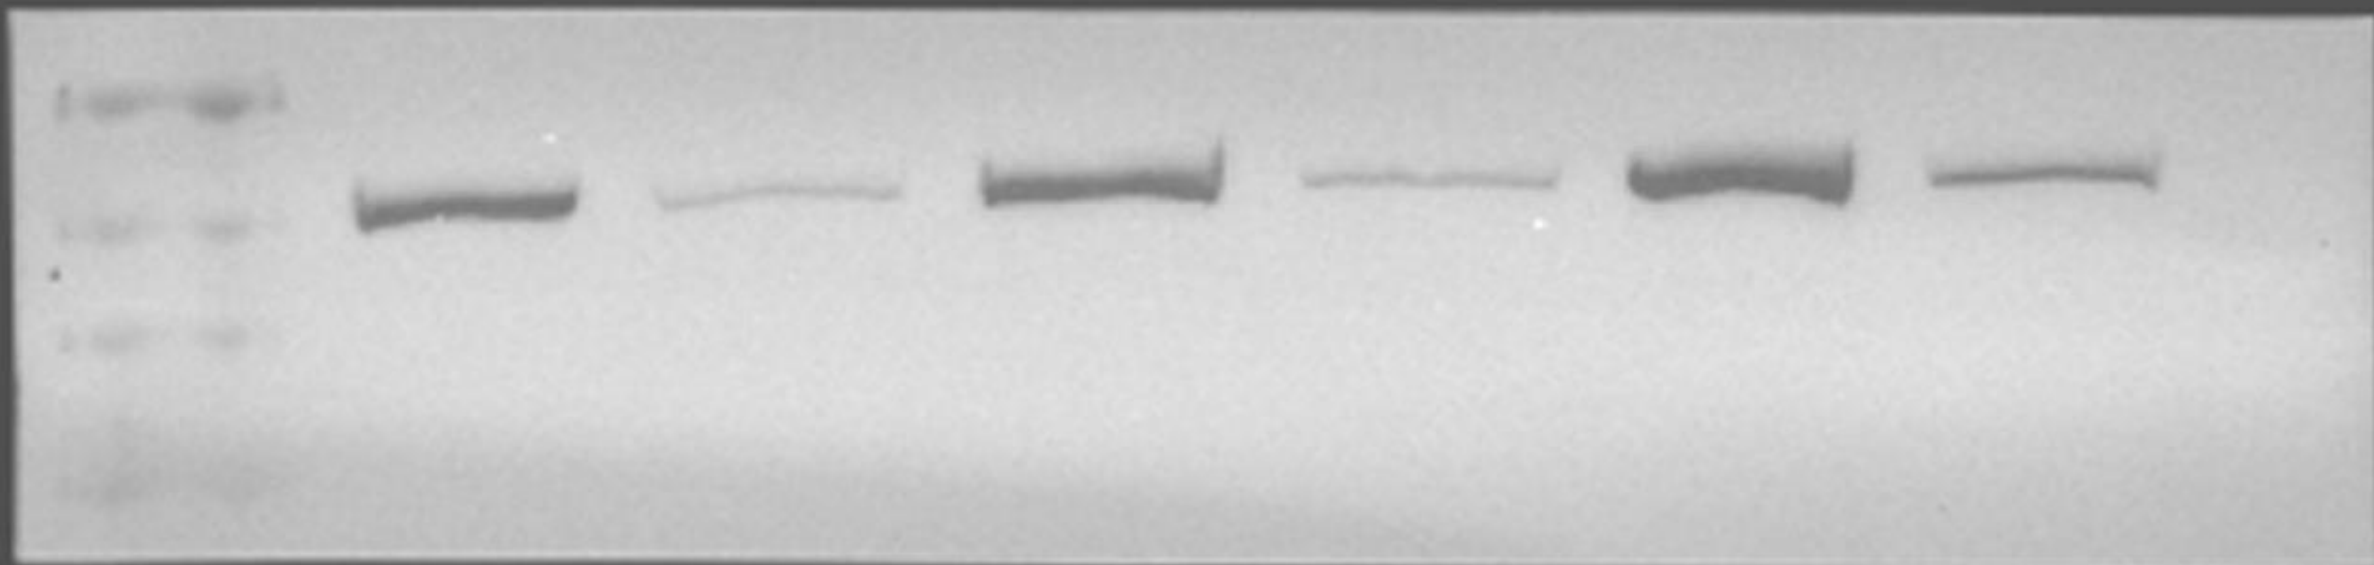

Supplement: fig4-data2 [file elife-95229-fig4-data2-v1.zip]

Biological Replicate

| 1         |       |       |  | 2         |       |       |  | 3         |       |       |  |
|-----------|-------|-------|--|-----------|-------|-------|--|-----------|-------|-------|--|
| EGFP-HRas |       |       |  | EGFP-HRas |       |       |  | EGFP-HRas |       |       |  |
| V12       | V12   | V12   |  | V12       | V12   | V12   |  | V12       | V12   | V12   |  |
|           | C181S | C184S |  |           | C181S | C184S |  |           | C181S | C184S |  |

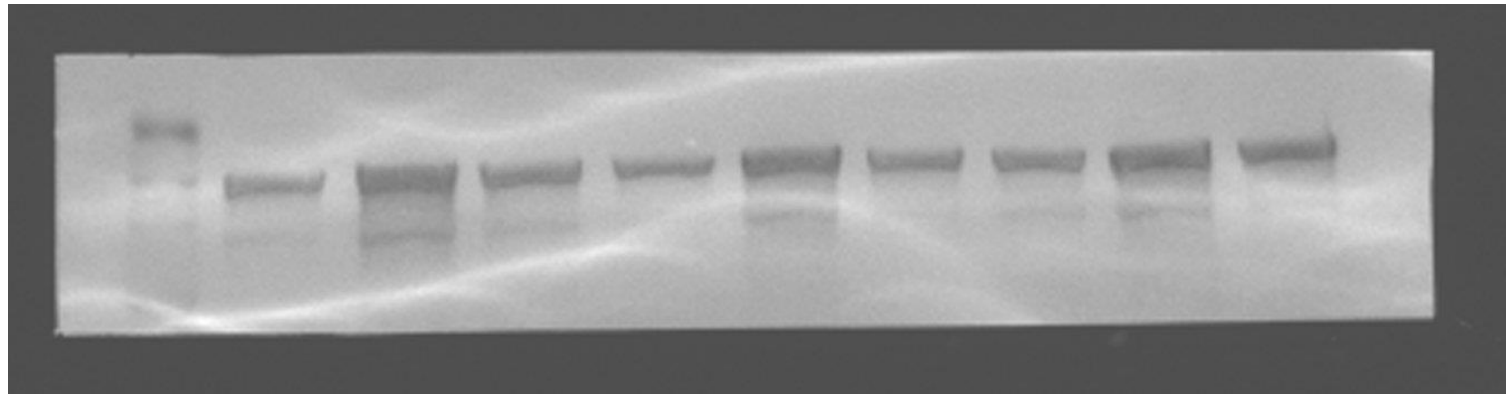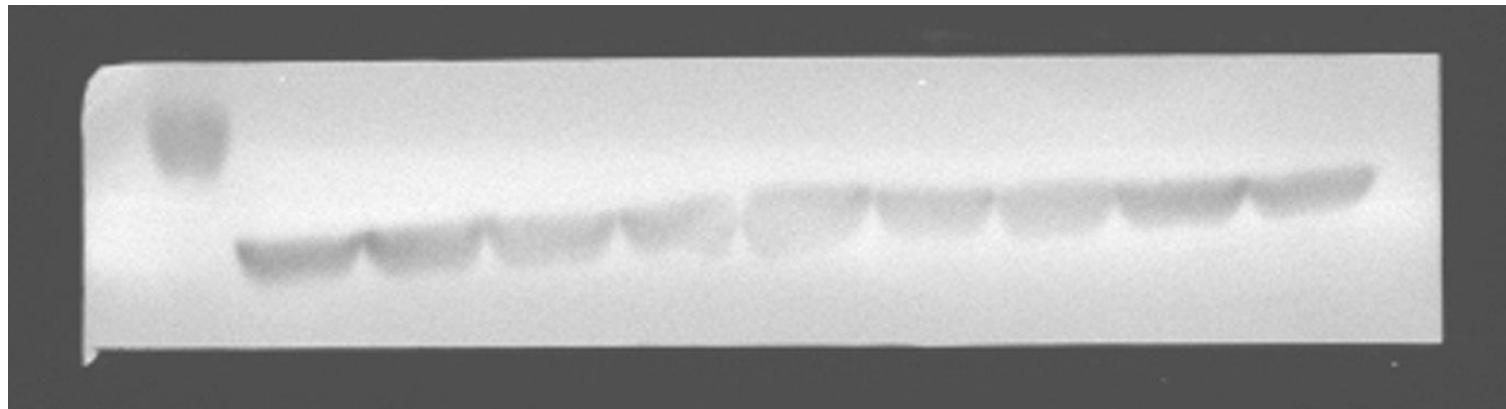

Supplement: fig4-figsupp1-data1 [file elife-95229-fig4-figsupp1-data1-v1.zip]

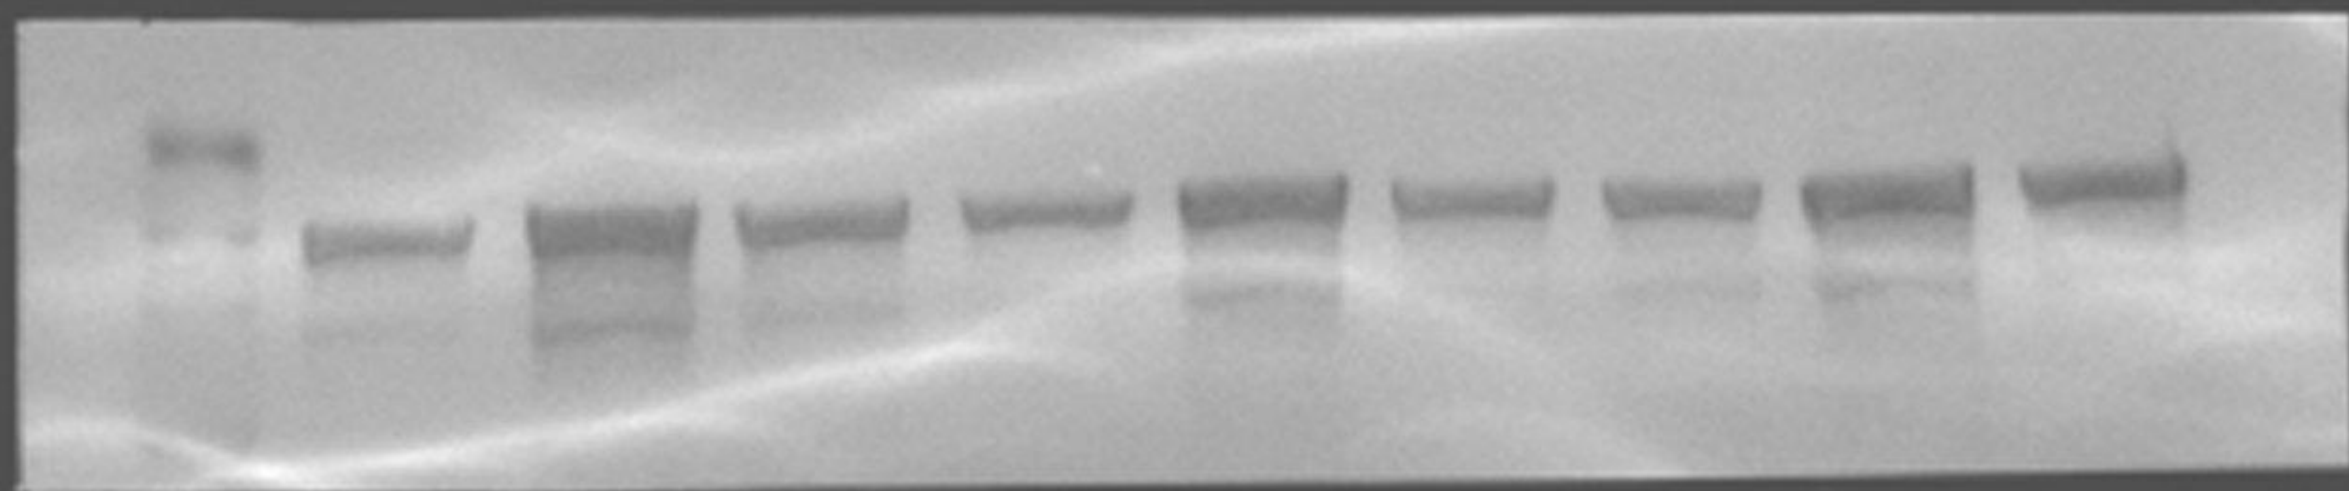

Supplement: fig4-figsupp1-data2 [file elife-95229-fig4-figsupp1-data2-v1.zip]

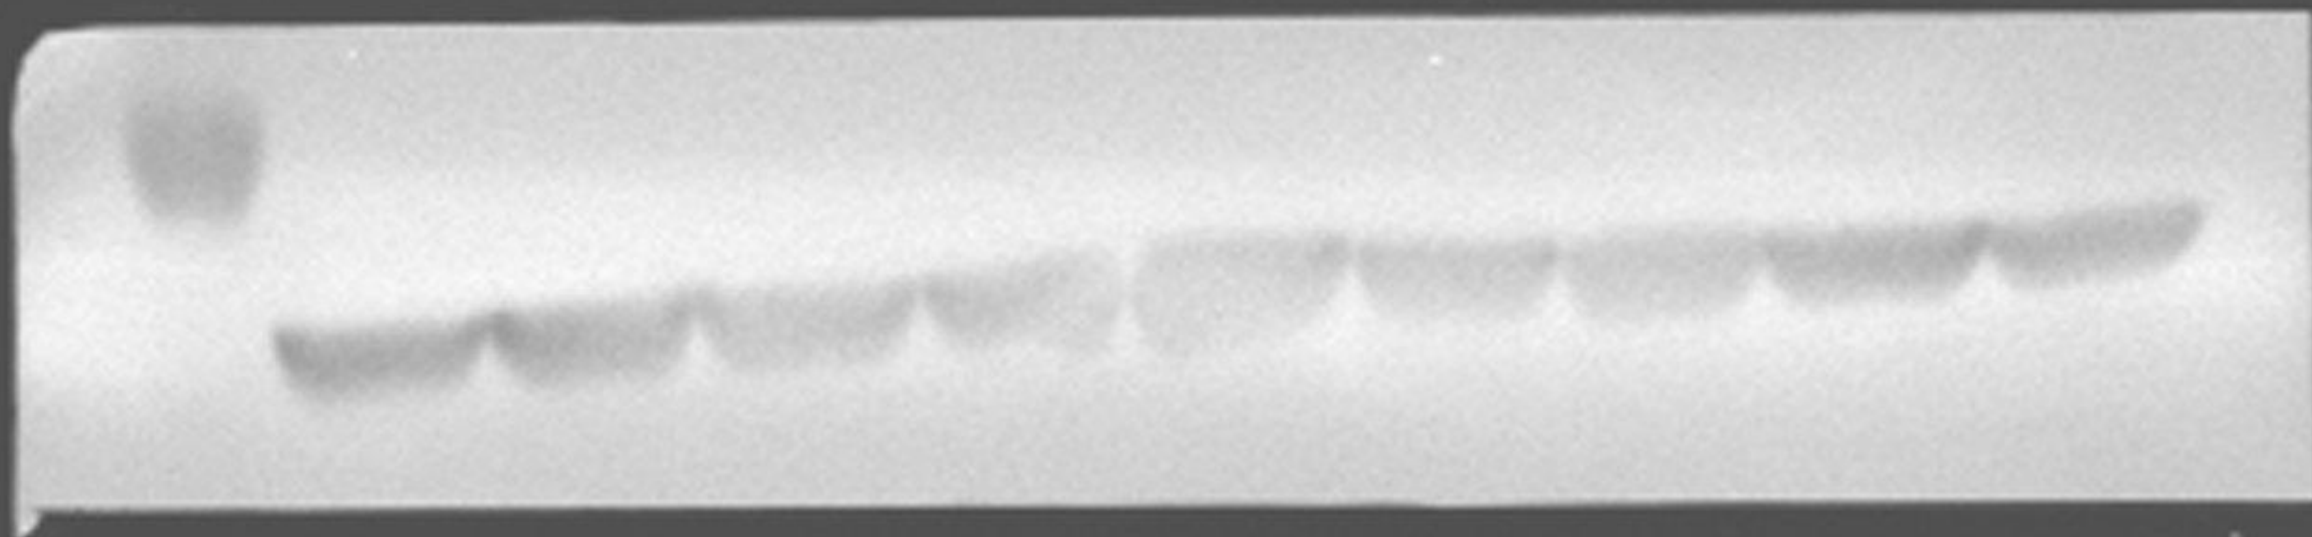

Supplement: fig4-figsupp1-data2 [file elife-95229-fig4-figsupp1-data2-v1.zip]
